# Supplementary material for: Comprehensive map and functional annotation of the mouse white adipose tissue proteome
Source: PeerJ. 2019 Jul 25;7:e7352. doi: 10.7717/peerj.7352 (PMC6661141; doi:10.7717/peerj.7352)
Supplement: Supplemental Information 2 [file peerj-07-7352-s002.xlsx]

## Sheet: Sheet1
Table S1:The qualitative results of WAT proteome from three technical replicates.
	Proteins	Unique peptides	Spectral
run1	5561	53743	179210
run2	5534	53187	166571
run3	5572	53879	170922
sum	6039	60215	516703
