# Supplementary material for: Comprehensive map and functional annotation of the mouse white adipose tissue proteome
Source: PeerJ. 2019 Jul 25;7:e7352. doi: 10.7717/peerj.7352 (PMC6661141; doi:10.7717/peerj.7352)
Supplement: Supplemental Information 5 [file peerj-07-7352-s005.xlsx]

## Sheet: Sheet1
Table S4: iBAQ intensity of quantitative WAT proteins.
Accession	Protein Intensities	iBAQ value	Percentage（according to estimated concentration）	high-abundance proteins	middle-abundance proteins	low-abundance proteins
P07724	1.09004e+07	286853	0.0933178	+
P16015	1.81372e+06	120915	0.0168163	+
O54724	1.12085e+06	80060.5	0.0166659	+
P58774	1.39578e+06	87236.2	0.0135665	+
P20152	1.57904e+06	49344.9	0.0125468	+
P31001	1.3125e+06	42338.7	0.0107272	+
Q60605	1.29704e+06	129704	0.0103995	+
P37804	1.39834e+06	87396.2	0.00934409	+
P16045	1.08345e+06	120383	0.00847525	+
Q08091	707664	50547.4	0.00798497	+
P01867	420967	32382.1	0.00678753	+
P29699	419540	38140	0.00674198	+
P56480	733201	25282.8	0.00674133	+
P63017	618534	18743.4	0.00629112	+
P51885	553266	34579.1	0.00626639	+
P19096	561210	4796.67	0.00618867	+
O08638	541828	5585.86	0.00600592	+
Q08857	374051	23378.2	0.00583452	+
Q8QZT1	599391	27245	0.00578257	+
P31786	363920	121307	0.00574524	+
Q04857	473602	10295.7	0.00528995	+
Q8VCT4	447329	17204.9	0.00503454	+
P51174	447673	21317.8	0.00483673	+
P17182	462398	21018.1	0.00469241	+
Q63918	401607	20080.4	0.00444729	+
P06801	417181	14385.5	0.00435707	+
P18242	365795	20321.9	0.00432645	+
Q6PDN3	389639	4281.75	0.00431773	+
P40142	390164	13453.9	0.00430919	+
P56395	356259	59376.5	0.00428585	+
Q8BMS1	391803	10883.4	0.00426104	+
Q8CGN5	466956	16101.9	0.00423965	+
Q04447	320311	20019.4	0.00404966	+
Q9CZ13	328354	15635.9	0.00391371	+
P07356	432769	20608	0.00377473	+
P62806	406508	67751.3	0.00364745	+
Q8BTM8	344765	2672.59	0.0035595	+
P45952	320498	16024.9	0.00352757	+
Q9Z0F7	441805	55225.6	0.0034419	+
Q9CQV8	347848	24846.3	0.00330495	+
P07759	277007	14579.3	0.00323687	+
P14152	261192	18656.6	0.00322598	+
P08249	379946	18997.3	0.00320394	+
P47738	273925	11909.8	0.00318892	+
Q02788	286743	6100.91	0.00318797	+
P13020	242296	7815.99	0.00318124	+
P15105	236587	15772.5	0.00314616	+
Q8BH64	336622	10858.8	0.00314598	+
P17742	361976	36197.6	0.00308079	+
Q91V92	309469	5429.27	0.00307849	+
P13707	407685	16986.9	0.00302262	+
P10493	200876	4671.54	0.00302074	+
Q00623	287683	20548.8	0.00297947	+
P97315	335055	30459.5	0.00296914	+
P01837	212065	53016.3	0.00295723	+
P20029	275313	8603.53	0.00295093	+
Q99KI0	261051	7251.42	0.00293502	+
Q8BFW7	186594	9329.72	0.00291132	+
Q05920	255674	4565.6	0.00280408	+
Q03265	304139	9810.95	0.00277637	+
P35700	361366	25811.9	0.0027109	+
P01872	242871	11039.6	0.00261266	+
P11499	228536	6529.59	0.00257537	+
Q91VJ2	211425	19220.5	0.00253548	+
P14211	244874	11130.6	0.00253001	+
P63101	268316	19165.4	0.00252069	+
P41216	245311	6630.03	0.00244759	+
P97457	298463	27133	0.00243575	+
P17751	285779	15876.6	0.0024205	+
Q61171	233554	23355.4	0.00240894	+
Q9D3D9	86223.5	28741.2	0.00239567	+
P23953	196410	8183.74	0.00236636	+
Q9CQX2	177599	29599.9	0.00228752	+
P28654	228022	12001.2	0.00226261	+
Q9R0P5	281693	25608.4	0.00224624	+
P09103	269996	8181.69	0.0022109	+
P06151	229562	12753.5	0.00220447	+
Q99LC5	264172	13208.6	0.00219002	+
O35678	233014	13706.7	0.00216729	+
Q61554	207160	1458.87	0.00215758	+
P48036	292745	12728	0.00215514	+
P14602	234994	19582.8	0.0021344	+
Q62000	185271	13233.6	0.00213165	+
Q9D2G2	201634	9165.19	0.00212663	+
O88322	149007	2865.52	0.00208874	+
Q60972	119987	9229.8	0.00208313	+
Q9Z2I9	242876	8375.03	0.00198769	+
Q9D6J6	227438	15162.6	0.00195931	+
P08207	147341	36835.3	0.00195131	+
O88569	209269	11014.2	0.00195104	+
P97927	169909	2022.73	0.00193333	+
Q99P87	161571	32314.3	0.0019116	+
P19783	225180	20470.9	0.00189342	+
Q9EQ20	191528	6840.29	0.00187616	+
Q8VDD5	178425	1749.26	0.00187537	+
P62259	229230	13484.1	0.00186303	+
P16546	196410	1373.5	0.00185127	+
Q61838	141677	2322.57	0.0018243	+
P48678	219745	5110.34	0.00179676	+
P61982	211256	13203.5	0.00176979	+
P08113	156152	4003.9	0.00175356	+
P99027	158880	31776	0.00175337	+
P09813	161518	32303.7	0.00173012	+
P14824	206252	4796.56	0.00172382	+
P63038	195809	5933.61	0.00171293	+
Q99L13	141272	10090.8	0.00169361	+
P05977	202078	16839.8	0.00164245	+
P02469	122126	1744.66	0.00162844	+
P62962	205621	22846.8	0.00161835	+
P12787	185787	20643	0.00157413	+
Q9DCD0	128461	6117.2	0.00154259	+
Q8R2Y2	140897	4545.06	0.00154002	+
P18760	175003	17500.3	0.0015382	+
P63028	114985	16426.4	0.00151402	+
P38647	163949	4314.44	0.00150104	+
Q91VS7	89464.7	17892.9	0.00148728	+
Q99L47	89951.6	7495.97	0.00147879	+
Q9DB77	122698	6457.8	0.00147522	+
Q8K2B3	141077	4275.05	0.00146958	+
Q99PT1	105217	13152.2	0.001458	+
O08677	117404	4192.99	0.00145165	+
Q01853	143195	3409.41	0.00144226	+
O70251	146597	12216.4	0.00142868	+
Q8VCM7	146353	6098.05	0.00142641	+
P00329	105097	7506.91	0.00141393	+
P63158	83003.9	11857.7	0.00139797	+
Q9D051	134858	7492.13	0.00138155	+
P11404	172755	19195	0.00134714	+
Q62417	142383	1977.54	0.00133994	+
O88492	202461	2024.61	0.00133678	+
P07901	111633	3283.31	0.00131842	+
P03953	88279.4	9808.82	0.00130333	+
P00405	63502.7	10583.8	0.00130199	+
Q05793	96590.9	675.461	0.0012741	+
Q64433	196187	24523.4	0.00127323	+
O08709	148518	10608.4	0.00124952	+
P11087	135203	1904.27	0.00124487	+
P99029	167019	11929.9	0.00123718	+
Q60597	105138	2236.98	0.00123367	+
P97447	121990	8132.67	0.00122815	+
Q9DCX2	137950	13795	0.00122494	+
P07309	114070	16295.7	0.00121751	+
P19324	124390	5408.27	0.00119187	+
Q8BH95	126254	7890.88	0.0011762	+
P27773	130507	4350.23	0.00116771	+
P56391	145083	24180.6	0.00115333	+
P35486	123834	5628.81	0.00115243	+
Q9DCW4	112316	8639.72	0.00113027	+
Q64727	150748	2037.14	0.00112606	+
Q9WVA4	148072	10576.6	0.00112178	+
Q9WTP6	125242	8945.83	0.00112138	+
Q91YE8	90862.9	2019.18	0.00111433	+
P19536	136152	17019	0.00111331	+
Q60994	95843.3	8713.03	0.00110626	+
P26039	115723	863.607	0.00110357	+
P47757	126040	7414.11	0.00110062	+
Q61753	81406.1	4070.31	0.00109077	+
Q3UJV1	107835	3993.88	0.00108513	+
O70209	100155	6676.99	0.00108462	+
O35206	65082.9	1627.07	0.00108245	+
Q9D6R2	113965	5698.24	0.00106969	+
Q62087	74372.1	5720.93	0.00106617	+
Q03734	100112	4767.26	0.00106258	+
P20108	118965	7930.99	0.00105647	+
P10605	88906.9	5927.13	0.00104644	+
Q9ESN9	83413.1	1489.52	0.00104094	+
Q8K0E8	103913	3996.64	0.00103634	+
Q9D0M3	86364.1	6168.87	0.0010321	+
Q9QZJ6	93287.8	11661	0.00102376	+
O08749	83328.7	3968.03	0.0010199	+
Q921G7	99991.2	3124.72	0.00100764	+
Q9WVL0	113616	8739.7	0.00100476	+
P14069	104841	20968.2	0.000998066	+
P14206	83408.5	6416.04	0.000997815	+
P16125	97909	5759.35	0.000997535	+
P54310	100632	2515.81	0.000993057	+
Q7TPR4	107480	2027.93	0.000989883	+
P35564	74257.6	3094.07	0.000985846	+
P61979	97634.2	4068.09	0.000982123	+
Q9CRB9	94178.5	7848.21	0.000978827	+
Q07417	92071	4603.55	0.000978682	+
Q6PDH0	95800.3	1368.58	0.000972691	+
Q9D855	91011.8	15168.6	0.000971781	+
O88342	95753.5	3088.82	0.000971428	+
Q91WD5	97204.4	3888.17	0.000969039	+
O88844	113214	4354.38	0.000962511	+
Q99LX0	121655	10137.9	0.000961258	+
P06728	102762	4467.92	0.000952811	+
Q9QZQ1	85539.6	972.041	0.00095063	+
P47754	78931.5	6071.66	0.000947974	+
P57759	83242	6936.84	0.000946912	+
Q9QZZ6	66646.3	8330.79	0.000946653	+
Q9JJU8	108891	15555.9	0.000943827	+
Q68FD5	91093.3	1035.15	0.00093908	+
Q9Z2V4	96581	2840.62	0.000933013	+
P21614	87344.6	3639.36	0.000923814	+
Q8BG05	92988.9	4894.15	0.000919082	+
O54990	75728.4	1992.85	0.000916545	+
Q9DBL9	62934.1	4841.08	0.000897694	+
P34914	75631.5	3025.26	0.000895664	+
P28656	52996.4	4076.64	0.000875471	+
O09165	35780.9	3975.65	0.000873232	+
Q99LJ7	51965.5	3056.79	0.000870969	+
Q61207	92484.6	2983.37	0.000867807	+
P32020	74255.5	3093.98	0.000866351	+
Q6NXH9	92736.9	3091.23	0.00086246	+
Q8BPN8	68908	538.344	0.000862282	+
P57780	95118	1729.42	0.000859808	+
Q76MZ3	88834.7	2776.08	0.000858811	+
Q8R081	59286.9	2823.19	0.000855219	+
Q9D172	83199	6399.92	0.00085141	+
P14869	68225.8	5248.14	0.00085044	+
P11352	104326	8025.05	0.000848686	+
P10107	96442.4	4592.5	0.000842462	+
P50543	80075.1	16015	0.00084056	+
Q70IV5	82580.6	1019.51	0.000836336	+
Q8BFY9	60369.4	1724.84	0.000836112	+
O54962	86991.2	17398.2	0.000832404	+
P09055	67469.5	1984.4	0.000829171	+
Q01768	110908	10082.5	0.00082908	+
Q8BWT1	87187.1	4151.77	0.000822477	+
P50544	97604.2	2440.11	0.000819047	+
P16110	50202.2	6275.28	0.000817721	+
P37040	78038.9	2229.68	0.000813554	+
Q91ZA3	92351.2	2147.7	0.00081291	+
Q62009	69986.9	1841.76	0.000812438	+
Q05816	79098	11299.7	0.000810047	+
Q922R8	59930.1	3525.3	0.000803066	+
P08003	82337	2352.48	0.000801975	+
P11679	92347.2	3078.24	0.000795479	+
Q91WU0	78097.7	2693.02	0.000785798	+
P70296	71573.1	7952.57	0.000784532	+
Q9DCN2	66929.8	4780.7	0.000772676	+
Q01339	91972.4	4180.56	0.000764577	+
Q9D7N9	72962.5	3474.4	0.000764048	+
P32261	89869.6	3098.95	0.000763223	+
Q9JK53	89295.5	3720.65	0.000762841	+
P34884	63916	12783.2	0.000756998	+
P11276	59769.5	580.286	0.000748992	+
P19001	109546	3533.75	0.000745449	+
P57776	85053.1	5003.12	0.000741484	+
Q9D7X3	61113.9	7639.24	0.000740657	+
P70404	58456.3	3653.52	0.000740302	+
Q62264	63947.9	9135.42	0.000739531	+
P13412	36417.6	7283.53	0.000736705	+
Q93092	66386.6	4149.16	0.000734658	+
Q9CR68	73431.3	5245.09	0.000729505	+
Q9R0P9	61902	6190.2	0.000728162	+
P45376	77181.1	4287.84	0.000725606	+
Q8BMF4	74096	2245.33	0.000722472	+
Q9Z2U1	57623.9	5762.39	0.000720759	+
Q60930	71842.1	4789.48	0.000719778	+
O35459	83338.8	4166.94	0.000712763	+
Q62261	75909.1	546.109	0.000709237	+
Q8BFR5	90456.1	3015.2	0.000706966	+
O08553	71892.1	2396.4	0.000706803	+
P58252	70334.9	1563	0.00070553	+
Q9CQ62	73626.7	4090.37	0.000701518	+
O09164	53914.7	5391.47	0.000699416	+
Q9DCJ5	66220.8	7357.86	0.000696636	+
Q91W90	66451.5	3164.36	0.000695586	+
Q9DCT2	81158.4	4774.02	0.000681664	+
P40936	43399.2	4822.13	0.000672772	+
Q9WTQ5	49501.3	785.734	0.000672417	+
O55022	51907.1	6488.39	0.000666639	+
Q9WVK4	67260.3	2319.32	0.00066567	+
P06745	57962.1	2229.31	0.000662682	+
Q9Z172	45021.8	11255.5	0.000662575	+
P20801	76835.1	7683.51	0.000658988	+
Q8BKZ9	54040.1	2573.34	0.000658096	+
P61161	40303.8	3100.29	0.000657207	+
Q62465	47823.9	3188.26	0.000650724	+
O08795	37277.6	2329.85	0.000648719	+
Q8R0Y6	74597	1381.43	0.000645785	+
P61022	60744.5	6074.45	0.00064534	+
Q61425	55126.6	3937.61	0.000642686	+
P68510	76487.1	4780.44	0.00063871	+
Q9DBR7	54331.3	1155.99	0.000629584	+
Q9CPQ8	57920.9	11584.2	0.000626762	+
P23492	61409.4	4093.96	0.000625797	+
P68254	66256.9	4732.64	0.000622606	+
Q9R0Y5	67087.3	6098.85	0.000622146	+
Q61598	69694.1	2581.26	0.000617793	+
Q61738	45346.1	1007.69	0.000617206	+
Q9JLV1	64752.9	2088.8	0.000611957	+
Q05421	45233.2	2261.66	0.000608435	+
P31324	63692.7	2769.25	0.00060548	+
Q9JHI5	60305.4	2741.15	0.000601387	+
Q9CXZ1	70448	6404.36	0.000600081	+
P07310	55605.9	2926.63	0.000596615	+
Q8BHN3	50601.8	1176.79	0.000595833	+
Q6IRU2	66232.1	4415.47	0.000595312	+
P14733	66868.6	1857.46	0.000587511	+
P24452	34722.5	3156.59	0.000586623	+
P16332	52276.1	1493.6	0.000586004	+
Q61292	54751.1	629.323	0.000585879	+
Q9DBB8	47629.6	3402.11	0.00058488	+
O35658	51398	3953.69	0.000580701	+
Q9CPP6	45711	9142.2	0.000578428	+
Q9JKS4	43110.6	1596.69	0.000577959	+
P10639	73117.8	10445.4	0.000577546	+
Q9D0I6	49536.7	2358.89	0.000577457	+
P84104	43867.3	6266.76	0.000573696	+
O35887	52188.7	3261.79	0.000572548	+
Q9DBJ1	54026.6	4155.89	0.000567472	+
Q60854	58977.1	2808.44	0.000566577	+
Q8CAQ8	66961.2	1424.71	0.000566106	+
Q99KJ8	54095.2	2704.76	0.000565125	+
Q3UTJ2	54997.9	901.605	0.000565125	+
Q9CYH2	63499.6	4884.59	0.000564313	+
Q9D1D4	42645.9	4738.44	0.000559015	+
P01878	34945.1	3176.82	0.0005548	+
Q60932	61314.4	3606.73	0.000552607	+
P50396	55329.8	2305.41	0.0005516	+
Q9D819	63993.3	3555.19	0.000550013	+
P21550	49302.5	2465.13	0.000549	+
Q60668	39250	3019.23	0.000548425	+
Q78ZA7	40633.5	2708.9	0.000547544	+
Q9D1G1	72908.7	5207.77	0.000547216	+
Q9JLJ2	53493.6	2139.74	0.000542291	+
Q9DBP5	51571.6	5157.16	0.000541363	+
Q9WUM5	40962.7	3150.98	0.00053953	+
Q8R4N0	69743.2	3032.31	0.000539226	+
Q9QZ47	28096.2	3512.02	0.000536267	+
Q9D9V3	60475.3	3182.91	0.000534626	+
P60867	42121.5	8424.31	0.00053353	+
P80316	58433.9	1884.97	0.000532263	+
O88990	57604.5	1086.88	0.0005304	+
Q8K3J1	60442.6	4649.43	0.000529299	+
Q8VHX6	54234.4	381.932	0.00052658	+
P12970	40767.5	3706.14	0.000526154	+
Q99LC3	51552.5	2713.29	0.00052175	+
P62264	27016.3	6754.08	0.000520515	+
Q99JR5	41252.3	2062.62	0.000514434	+
Q99P72	33377.3	855.829	0.000513188	+
P51660	46281.3	1361.22	0.00051239	+
E9PV24	42981.3	1228.04	0.000508487	+
Q9CQ60	47241.7	3936.81	0.000508146	+
Q9DCS9	50525.7	5052.57	0.000503067	+
P48771	45314.5	11328.6	0.000498466	+
P01027	56388.8	563.888	0.000498009	+
P28474	45039.7	2649.39	0.000496209	+
P08226	43270.2	2884.68	0.000490001	+
Q91VI7	53698.6	2065.33	0.000487258	+
P02535	45604.8	1754.03	0.000479906	+
P62751	40057.5	5722.51	0.000479566	+
P34022	25735.3	4289.21	0.000479326	+
Q9R0H0	46070.2	1355.01	0.000479034	+
P20918	47773.2	1111	0.000477789	+
Q9D1Q6	40405.4	2126.6	0.000471874	+
Q06890	36621.6	1927.45	0.000471521	+
P42125	55523.3	3084.63	0.000471128	+
P70349	57732.6	7216.57	0.000470851	+
Q9D1A2	45208.6	1883.69	0.000470735	+
Q9CYZ2	53561.2	4120.09	0.000469143	+
P61089	57594.1	5759.41	0.000467452	+
Q9EQU5	29470.9	2947.09	0.000465874	+
Q9ESB3	38223.8	1661.9	0.000465651	+
Q99JY0	47799.5	1911.98	0.000465298	+
Q61937	36194.6	3016.22	0.000465111	+
P51150	58368	4169.14	0.000463797	+
P55002	23691.4	4738.28	0.000461766	+
Q91VR2	35441.3	2953.44	0.000459984	+
P97371	50532.1	3368.8	0.000457461	+
Q3U7R1	37334	794.34	0.000457283	+
Q9CQN1	46689.4	1197.16	0.00045476	+
Q9DCS3	37887.9	2368	0.00045243	+
Q3TLD5	37141.3	1614.84	0.000451872	+
Q9CZU6	36529.6	1826.48	0.00044752	+
O55222	43890.3	1828.76	0.00044493	+
O35945	39572.7	1720.55	0.0004448	+
Q9R0P3	41959.2	2997.08	0.000444541	+
P11688	30871	812.394	0.000442623	+
Q8CI94	45257	962.915	0.000441115	+
Q9QZA0	38139.4	2542.63	0.000440999	+
P26883	23263.5	7754.5	0.000437855	+
Q6PDM2	43290.2	3330.02	0.000437563	+
P47753	36452.1	2804.01	0.00043743	+
Q9DB20	47439.5	3953.3	0.000437423	+
P43025	28892.4	4127.48	0.000435069	+
Q9DAS9	45847.8	11461.9	0.000434109	+
P08122	42416.7	543.804	0.000430932	+
Q9D0F9	48880.2	1481.22	0.000430846	+
P52825	40567.8	1229.33	0.000430713	+
P24369	49841.7	3833.98	0.000430577	+
Q8BG95	40572.8	828.016	0.00042764	+
Q9D0K2	38336.3	1597.34	0.000423546	+
Q9DCT8	27237.1	3891.01	0.000418791	+
Q3TJD7	42100.3	1754.18	0.000416366	+
Q64521	46603.8	1083.81	0.000415521	+
P80314	48412.9	1512.9	0.000411825	+
P67778	49273	2898.41	0.000409339	+
P63323	41319.2	5902.75	0.000406038	+
Q925H3	42908.9	10727.2	0.000403583	+
P49312	44848.5	2491.58	0.00040352	+
P42208	40986	2049.3	0.000403019	+
Q6WKZ8	34162.5	427.031	0.000402762	+
Q9D8N0	42205.6	1688.22	0.000400251	+
Q00519	28700.3	574.006	0.000398417	+
Q923D2	45406.1	3783.84	0.000397777	+
P97807	41391	1533	0.000394636	+
Q8QZR5	31580.6	1503.84	0.000392723	+
Q62523	24476.2	1359.79	0.000389901	+
P35762	22308	3186.86	0.000389595	+
P17225	29119.1	1455.96	0.000389437	+
Q9JHU4	39664.4	154.336	0.000388885	+
Q61335	40954.9	2925.35	0.000387318	+
Q60864	44281.1	1302.38	0.000386005	+
P10922	23405	3900.83	0.000385393	+
P67984	22049	5512.25	0.000385294	+
Q8CAY6	31479.8	1967.49	0.000384803	+
P06909	32563.7	581.494	0.000383164	+
Q61599	38919.5	3538.14	0.000382898	+
Q61247	26326.4	1462.58	0.000380771	+
P01887	34911.2	5818.54	0.000379686	+
Q921F2	23384.4	1798.8	0.000379499	+
Q01730	35552.5	2539.47	0.000379451	+
P40124	41895.6	1551.69	0.000378934	+
P45591	46910	4264.55	0.00037787	+
P52503	42845.7	6120.81	0.000377416	+
Q60870	26483.9	3783.42	0.000377176	+
Q8BJ56	34074.4	1481.5	0.000376467	+
Q8BX02	35945	876.708	0.000374705	+
Q62426	35815.2	7163.04	0.000374703	+
Q9QUM9	37510.4	2885.41	0.000374042	+
P10833	53133.2	3320.83	0.000373741	+
Q8BZF8	39270.3	1266.78	0.000373282	+
P30115	34114.9	3101.35	0.000372486	+
Q3URD3	44276.9	805.034	0.00036957	+
P58871	35161	428.792	0.000369245	+
P59266	15455.2	2575.87	0.000366162	+
O88487	21416.4	1127.18	0.000365107	+
P97465	33730.5	1466.54	0.000364304	+
Q9CQC7	25447.9	5089.58	0.000363522	+
Q06770	30844.4	1713.58	0.000363313	+
P62821	50666.5	3377.77	0.000362771	+
P99026	28937.9	2630.72	0.000362749	+
P42932	46134.5	1281.51	0.000361449	+
Q8CFX1	29125.6	856.635	0.000360777	+
P97449	32591.9	693.446	0.000360106	+
Q9D6J5	34716.3	3471.63	0.00035966	+
Q8BIJ6	29603.2	672.801	0.000359429	+
P03987	29132.1	1713.65	0.000356516	+
Q07076	28644.5	1507.61	0.000356459	+
Q9QXG4	26434.2	944.078	0.000352594	+
Q8BSY0	25093.7	896.204	0.000352465	+
Q99020	31380.3	2413.87	0.000352465	+
Q9R0Q7	35750.2	3972.25	0.000352189	+
Q8CGZ0	22400.3	700.008	0.000351971	+
P80313	36097.5	1244.74	0.000351647	+
Q9QXT0	39172	3561.09	0.000350242	+
P09405	34582.5	960.626	0.000349057	+
Q8VCR7	36105.2	3282.29	0.000348989	+
O70571	34723.4	1578.34	0.000348299	+
Q7TQI3	35208.8	2347.25	0.000347612	+
P56959	18077.6	1390.58	0.0003469	+
Q8VEE0	17549.4	2924.9	0.000345527	+
Q99KQ4	36794.3	1314.08	0.000345071	+
Q9Z2X1	25420.9	1588.8	0.000344092	+
P97390	35728.9	1116.53	0.000343986	+
Q9WUM3	25516	1342.95	0.000342885	+
O08807	37292.9	2330.81	0.000342776	+
Q921U8	31681.7	720.039	0.000341997	+
O35855	30957.5	1629.34	0.0003405	+
Q9ES97	27523.4	688.086	0.000338515	+
P51881	43374.2	2168.71	0.000338229	+
P28843	32532.5	813.312	0.000336786	+
Q8VEK3	25817.2	806.788	0.000335926	+
P97300	31943.8	1597.19	0.000335647	+
O88587	35927.6	2395.17	0.000334469	+
P31809	19793.6	1237.1	0.00033405	+
P26041	35312	1038.59	0.000333327	+
Q91VW3	26734.8	6683.71	0.00033163	+
O54931	22638.2	707.443	0.000330285	+
Q19LI2	30530.9	1221.24	0.000327086	+
Q8VHY0	21211.1	271.937	0.000324946	+
P56399	27184.1	715.371	0.000324676	+
O09111	31363.4	3920.42	0.000323872	+
Q60714	27817.6	959.229	0.000323793	+
P01631	27756.5	5551.3	0.000322663	+
Q9QYB1	35401.4	2360.09	0.000321108	+
Q02819	34087	1262.48	0.000319336	+
Q9ET01	33898.8	691.811	0.000319323	+
Q6Q477	24280.5	505.845	0.000318784	+
P68040	38350.9	1917.55	0.000318544	+
Q9CQQ7	39453.2	2320.78	0.000318176	+
P62852	24413.5	4882.7	0.00031778	+
Q6IRU5	23963.9	2662.66	0.000317423	+
Q8VEE1	39012.9	1625.54	0.000315597	+
P01642	21120.4	5280.09	0.000315457	+
Q61147	28025.9	549.528	0.000315297	+
Q9EPC1	25135	1570.94	0.00031493	+
Q99LF4	30043.9	1201.76	0.000314444	+
Q9Z0P7	24534.8	1226.74	0.000313477	+
P55302	29682.7	1562.25	0.000312341	+
Q9QY76	31814.5	2447.27	0.000312307	+
P24549	26621.3	1210.06	0.000312138	+
O35226	20941.7	1610.9	0.000310534	+
P52430	23079.2	1648.51	0.000308896	+
P00920	29173.6	2244.12	0.00030856	+
P16406	29531.7	602.688	0.000308137	+
P35980	21041.4	3005.92	0.000308132	+
Q9JHJ0	29600.5	1644.47	0.000307655	+
Q8VIJ6	22373	860.5	0.000307445	+
Q9WUA3	25063.3	759.494	0.000307371	+
O35639	37444.9	1783.09	0.000307252	+
Q99MR8	31797.4	815.318	0.000306367	+
Q8R317	14608.2	1043.44	0.000306265	+
Q9CY58	27435.9	1443.99	0.000305793	+
P01592	28643.1	3580.38	0.000305438	+
P51912	20906.4	1100.34	0.000304757	+
O08997	34959.4	8739.85	0.000303741	+
Q91YT0	28984.3	1260.19	0.000303384	+
P15089	30121.2	1309.62	0.000302606	+
O09061	31434.7	2418.05	0.000302004	+
Q9CQR2	34847	6969.4	0.000301723	+
Q9R0M4	13101	1191	0.000301147	+
Q9R062	18690.7	1699.16	0.000300976	+
Q8BPU7	29513.5	756.758	0.000300817	+
Q9CQH3	26296.9	2921.87	0.000300419	+
P21844	25266.9	2296.99	0.000300088	+
Q62188	29574.3	1019.8	0.000299134	+
P54731	22201.9	853.919	0.000298709	+
P09541	38706.4	2977.41	0.000298358	+
Q61879	27478.3	274.783	0.000298009	+
Q61316	33391.4	667.827	0.000297721	+
O89020	29890.3	905.767	0.000297605	+
Q6P069	31954.3	2904.94	0.000297534	+
P70168	22532.9	643.797	0.000296309	+
P35979	31614.8	3512.75	0.000296202	+
P99028	41854.5	5979.22	0.000295477	+
P45878	28290.2	4041.45	0.000293681	+
P05784	33844.1	1301.7	0.000293067	+
O70318	32634.5	562.663	0.000292966	+
Q9CR57	13095.2	2619.04	0.000292279	+
Q08879	25306.4	790.824	0.000292244	+
Q91V76	28001.1	1750.07	0.000290048	+
Q9CPU4	17886.2	3577.24	0.000287284	+
Q99LD8	30673.5	2044.9	0.000287106	+
P11983	31002.2	1000.07	0.000286301	+
P47964	14828.4	4942.81	0.000285949	+
P05202	32958.7	1267.64	0.000284631	+
Q8CHH9	22916.7	1206.14	0.00028454	+
P02463	26779.9	371.943	0.000283037	+
O54734	23152.3	1218.54	0.000282936	+
Q9EQH3	27982.7	650.762	0.000282655	+
A2ASS6	27788.6	15.2769	0.000282637	+
Q9DBG6	18897.8	858.991	0.000280959	+
Q62048	27572	3938.86	0.000280825	+
Q01149	30645.6	457.397	0.000280653	+
P46935	23644.9	576.704	0.000280515	+
P28653	24179.9	1422.35	0.000280485	+
Q9QXC1	22159.1	1384.94	0.00028015	+
Q60931	26853.1	1918.08	0.000279354	+
Q9D8E6	21229.2	1248.78	0.000278872	+
Q62186	18652.6	3108.77	0.000278799	+
Q62093	20708.3	2300.92	0.000277625	+
Q9EQK5	27487.4	610.831	0.000277498	+
Q9CPV4	36852.4	1754.87	0.000276892	+
Q9D1K7	26986.8	2998.53	0.000276576	+
Q8VCT3	26585.4	805.619	0.000276292	+
P58389	25378.9	1586.18	0.000275766	+
Q9JHU2	22279.9	928.328	0.000275664	+
Q8R0N6	19793.6	1164.33	0.00027536	+
Q2VLH6	25385.9	478.978	0.000274293	+
Q9CQA3	34530.2	1817.38	0.000273813	+
P50247	31496.7	1211.41	0.000273589	+
Q8BH61	24282.9	693.796	0.000273399	+
Q9QYG0	22634.4	1414.65	0.000273273	+
P80315	31733.8	991.681	0.00027271	+
P62814	25423.9	1016.96	0.000272361	+
Q8C1B7	23141.1	1157.05	0.000272313	+
P08228	32450.8	3605.64	0.000272241	+
Q9QZU5	14087.1	3521.78	0.000270889	+
P09671	27784.9	2315.41	0.000269787	+
Q9DBS1	25369.9	1268.5	0.000269036	+
Q91WS0	28111.6	4685.27	0.000268417	+
P80318	29909.4	934.67	0.000268378	+
P62242	23369.8	2336.98	0.000267899	+
Q62219	27080.9	1128.37	0.000267725	+
Q91VM9	30985.5	1475.5	0.000266336	+
Q3TTY5	30920.4	792.831	0.000266307	+
P50516	27111	821.544	0.000265839	+
Q8QZS1	31255.9	1302.33	0.000265443	+
O89079	21002.2	1615.56	0.000264479	+
Q61830	24360.7	338.344	0.000264357	+
Q80Y14	23960.1	3422.88	0.000264112	+
P53986	13609.2	1046.86	0.000264086	+
A2A8Z1	19428.1	669.934	0.000263687	+
O88545	18594.2	1549.52	0.000263299	+
Q9CR21	22394.9	3199.27	0.000263181	+
Q9CY50	15545.4	1727.26	0.000262301	+
P63254	25811.1	6452.77	0.000261267	+
O08788	23264.2	387.736	0.000260161	+
Q8K4Z3	24824.3	1773.17	0.000260093	+
P54728	15112.7	1259.39	0.00025953	+
P12367	22910.6	1205.82	0.000259203	+
Q9EST5	17547.9	1754.79	0.000258289	+
Q9JK48	19967.2	1331.14	0.000257561	+
Q8BP92	20405.4	1457.53	0.000257274	+
Q9D132	16912	1879.12	0.000256767	+
P62858	20716.5	6905.5	0.000256436	+
Q99PL5	36605	312.863	0.000256163	+
Q8VEM8	27275.3	1363.76	0.000255967	+
P01639	15103.2	3775.81	0.000255909	+
Q9D1M0	19653.7	1511.82	0.000254645	+
P01029	21728.7	278.573	0.000254513	+
P70290	25700.4	1028.02	0.000254274	+
Q8BFZ9	29698.5	1414.22	0.000253655	+
Q99MN9	26573.9	916.34	0.000253477	+
O88531	21698.9	1549.92	0.00025316	+
Q6WVG3	23811.7	1488.23	0.000252975	+
P11438	20668.7	1215.8	0.000252572	+
Q80X19	20650.1	275.334	0.000251682	+
Q8K3K7	25630.4	1708.69	0.000250939	+
Q5SUE8	19583.1	1305.54	0.000250782	+
Q8K010	20355.5	384.066	0.000250303	+
Q9QZM0	10188.1	783.703	0.000249976	+
Q923B6	23802.9	991.786	0.000248911	+
Q91V64	21329.3	1640.71	0.0002489	+
O08585	14344.3	2049.19	0.000248488	+
Q78IK2	24626.7	8208.91	0.000248087	+
O54774	21652.3	386.649	0.000247353	+
P47934	20575.4	734.835	0.000246528	+
Q9D7V2	19735.9	2192.88	0.00024607	+
Q8BJU0	18141.1	1511.76	0.000245735	+
P23198	19881.1	2485.14	0.000245458	+
Q62393	17042.3	2130.29	0.000245295	+
Q62086	16938.4	1302.95	0.000244467	+
Q99LY9	24474.2	4079.04	0.000244321	+
P97429	30159.3	1436.16	0.000244282	+
Q9ERS2	24456	3057	0.000244084	+
P38575	13136.8	2627.36	0.000243532	+
Q9D358	22594.2	2824.28	0.00024332	+
P97384	18008.7	947.828	0.000242752	+
Q9CVB6	28319.7	1490.51	0.000242526	+
Q99K48	15938.2	937.542	0.000242168	+
Q8CHT0	21466.5	825.633	0.000241805	+
Q9Z2C6	15424.4	1713.83	0.000241549	+
P35441	24652.4	391.307	0.000240259	+
P62311	12789.5	4263.18	0.000239162	+
P21278	22823.9	1201.26	0.000239077	+
Q9CQX8	18159.3	4539.83	0.00023867	+
Q9Z1P6	24018.7	4003.11	0.000238413	+
Q9DBG3	20193	480.786	0.00023813	+
Q61081	19099.9	1123.53	0.000237277	+
P56371	28643.1	2045.94	0.000236504	+
Q62266	41099.1	3161.47	0.000236034	+
P29341	21846.8	704.736	0.000235868	+
Q6PNC0	19262.2	148.17	0.000235785	+
Q9WTR5	19079.3	635.977	0.000235492	+
P56135	19070.9	4767.72	0.000233562	+
O88441	19886.3	1657.19	0.000233549	+
Q99K51	26359.8	693.678	0.000232402	+
Q9D5V6	15391.5	1183.96	0.00023186	+
Q9R1P0	21560.4	1658.49	0.000231477	+
Q62165	18567.3	501.82	0.000230304	+
Q3U0V1	20891.6	633.079	0.000230191	+
Q9CQM9	23111.1	1283.95	0.000229717	+
Q8BL97	20401.8	1569.37	0.000229054	+
Q9JM14	18852.3	2094.7	0.000228925	+
Q9CPR4	20305.7	2256.18	0.000228906	+
Q9CQI3	23073.7	2884.21	0.000228426	+
P61804	19285.6	3857.12	0.000228272	+
P47199	24549.1	1363.84	0.000227801	+
O08539	20885	745.892	0.000227743	+
P00493	25439.7	1956.9	0.000227708	+
Q9Z0P4	24212.2	1152.96	0.000227232	+
O88851	22935.8	2293.58	0.000227145	+
Q925B0	16026.8	1335.56	0.000227132	+
Q61703	20347.4	452.164	0.000226836	+
Q921M4	16056.9	422.551	0.000226694	+
Q6P5H2	20326.5	230.983	0.000226584	+
Q5FWK3	20867.1	948.504	0.000226448	+
Q60865	12834.4	611.163	0.000226257	+
P27546	21543.4	406.479	0.000226061	+
P55772	13343	833.936	0.000225928	+
Q62433	14414.2	1108.79	0.000225841	+
P62918	18696.3	1699.67	0.000225587	+
P48428	22382.6	3730.43	0.00022539	+
Q64133	19952	798.082	0.000225272	+
Q61792	22183.3	1584.52	0.000225082	+
Q6ZWX6	28833.8	1310.63	0.000224124	+
Q9R1P1	18516	2057.34	0.000223746	+
P53810	26626	1479.22	0.000223427	+
O88685	24743.3	951.667	0.000223318	+
P18872	19990.3	1175.9	0.000223227	+
P15306	7615.89	761.589	0.000223138	+
P18572	22193.9	1109.69	0.000223067	+
P54775	20840.5	992.406	0.000222818	+
P62754	14754.5	1639.39	0.000222681	+
Q9JKR6	21542.5	422.401	0.000222416	+
Q91YQ5	24670.6	685.295	0.000222411	+
Q60710	22557.2	644.491	0.000221747	+
Q9CQF9	19878.5	828.273	0.000221607	+
O70503	21517.4	1344.84	0.00022127	+
Q9JKW0	7956.02	1989.01	0.000220764	+
Q78PG9	24752.1	1904.01	0.000220739	+
P70269	5405.16	1081.03	0.000219825	+
P07214	17449	1342.23	0.000218984	+
P23506	20624.1	1874.91	0.000218738	+
Q9QYC0	14881.7	572.371	0.000218611	+
Q8BT60	19343.2	773.73	0.000218337	+
Q64471	18523.8	1683.98	0.000218311	+
Q62241	7920.71	2640.24	0.000217096	+
Q9D0S9	29014.3	2637.66	0.000216361	+
Q9CQH7	13222.3	2644.47	0.000216301	+
Q9WV54	21464.3	1022.11	0.000216226	+
P61961	19989.7	4997.43	0.000215791	+
Q8CGK3	17573	428.611	0.000214847	+
Q8BHG2	22644.3	2516.03	0.000214724	+
O70435	19098.2	1591.51	0.000214097	+
P60122	17983.7	899.183	0.000213834	+
Q62318	14652.1	505.245	0.000212592	+
E9Q4Z2	18883.7	162.791	0.000212592	+
P70372	18611.9	1240.79	0.00021254	+
Q99KP6	14597	810.945	0.00021215	+
P97352	24085.3	4014.21	0.000212123	+
Q61233	24233.2	637.717	0.000211863	+
P19221	18448.5	636.154	0.000211702	+
P29758	15696.2	923.308	0.00021144	+
Q9QYB5	15301.7	566.73	0.000211438	+
O70494	4863.82	540.424	0.000210803	+
Q91Z53	17616.4	1258.31	0.000210534	+
Q6P3A8	16574	1035.87	0.000210361	+
Q99MQ4	18760.8	1042.27	0.000210139	+
P16675	16418.1	820.905	0.00020933	+
O35326	11418.1	1427.26	0.000208816	+
Q91ZJ5	20830.3	771.492	0.000208188	+
Q9DBE0	21499.2	796.268	0.000207952	+
O70456	25297.2	1581.07	0.000207459	+
Q71LX4	22020.2	172.033	0.000206635	+
P47791	16225.1	811.254	0.000206173	+
P52840	19193.5	1279.57	0.000205878	+
Q8CGC7	19564	254.078	0.000204655	+
P26043	20785.6	629.866	0.000204465	+
Q9WV55	20129.3	1548.41	0.000204264	+
Q9CR61	21050.6	2631.32	0.000203507	+
O89023	13991.8	699.591	0.000203241	+
O55186	12575.1	3143.79	0.00020319	+
Q8BGC4	21163	1058.15	0.000203101	+
P11152	16074.2	803.711	0.000202151	+
Q9CRB6	24711.4	2246.49	0.00020178	+
O54984	16461	1097.4	0.000201765	+
P47963	17503.8	1750.38	0.000201487	+
Q9R1P4	25913.3	1439.63	0.000201447	+
P14115	17917	2559.56	0.00020129	+
Q9CQD1	19782.8	1798.43	0.000200996	+
Q9WVC3	20936.9	2326.32	0.000200807	+
P21619	23294.8	629.589	0.000200727	+
Q9R257	20115	2011.5	0.000200688	+
Q91VR5	20018.7	513.301	0.000200553	+
Q80X90	20479.9	151.703	0.000199605	+
Q8VBV7	14492.1	1811.51	0.000199514	+
Q60936	15173.1	583.58	0.000198282	+
Q7TMK9	19224.1	600.753	0.000198116	+
Q7TNG5	17140.4	591.048	0.000197995	+
P62830	25250.3	2805.59	0.000197518	+
P28481	21315.8	291.997	0.000196335	+
Q8C025	8361.99	929.11	0.000196276	+
Q9Z1Q5	22997	1533.14	0.000196135	+
Q9Z0X1	19167.1	618.294	0.000195504	+
Q8VCI5	21420.4	1260.02	0.000195331	+
O89086	19862.6	2482.82	0.000195251	+
P24527	21480.9	596.692	0.000195129	+
Q9CZ44	21248.9	1011.85	0.00019509	+
P62334	18634	931.698	0.000194911	+
P42669	10617.9	1179.77	0.000194909	+
Q8R2G4	17619.6	978.869	0.000194773	+
Q9CQ65	23829	1323.83	0.000194741	+
P97493	17987.8	2248.48	0.000194391	+
Q8CC88	20905.9	191.798	0.000193859	+
Q8BVI4	22409.5	1600.68	0.000193837	+
Q9Z1Z2	22096.2	1052.2	0.000191563	+
Q9QZ06	15899.4	1324.95	0.000190405	+
Q91V41	25224.6	1681.64	0.000190319	+
Q3UBX0	12212.2	1526.52	0.000190179	+
P01843	17313.2	3462.64	0.000189813	+
O70400	17922.7	1120.17	0.000189785	+
Q9D880	16075.3	1004.7	0.000189265	+
Q922Q1	16725.8	1045.36	0.000189087	+
Q9CXE7	18289.9	1524.16	0.000188915	+
Q9QYJ0	17403.2	870.159	0.000188517	+
Q9CWK8	17644.7	678.642	0.000187928	+
P09528	20676.3	1879.66	0.000187533	+
Q8CDN6	18416.5	1227.76	0.000187445	+
Q9R1P3	17267.9	1726.79	0.000187326	+
Q8CIB5	18772.9	507.375	0.000186944	+
P31428	18983.6	862.89	0.000186847	+
Q9Z2I8	23567.9	841.71	0.000186718	+
Q61206	12327.2	1540.9	0.000186681	+
O55143	16124.5	343.074	0.000186615	+
Q61739	17415.3	322.506	0.000186581	+
Q9WVE8	16223.4	705.366	0.000186515	+
Q9CXR1	17526.7	1030.98	0.000186357	+
Q9R111	21544.1	769.433	0.00018589	+
Q80VP1	7161.24	651.022	0.000185647	+
P62862	11786.6	5893.28	0.000185547	+
Q9WU78	18687.5	406.249	0.000184748	+
P97872	16900.2	650.009	0.000184703	+
Q62422	21317	1639.77	0.000184694	+
Q8R3V5	14856.9	873.933	0.000184196	+
Q9QXS1	21180.7	72.7859	0.000184143	+
Q61735	11733.3	1173.33	0.000183912	+
Q9D0E1	22956.6	499.056	0.000183517	+
Q62425	24883.9	4147.32	0.00018319	+
Q9CQC9	17254.4	1725.44	0.000182893	+
Q8K4G5	20729.5	398.645	0.000182761	+
Q9WTP7	25785.2	1516.78	0.000182647	+
Q791V5	14936	1148.92	0.00018227	+
Q8BP47	13741.3	597.447	0.000181874	+
Q7TQ48	13157.4	386.983	0.00018178	+
A6X935	15395.9	366.57	0.000181694	+
P30681	12678.4	1584.8	0.000181348	+
Q9DBH5	17984.1	946.534	0.000181235	+
P70202	7503.9	1500.78	0.000181184	+
O55131	16629.1	755.87	0.000180955	+
Q9JMG7	15297	1699.67	0.000180559	+
Q8K0U4	18242.9	506.748	0.000179686	+
Q05186	13915.6	993.97	0.000179415	+
Q9QZD8	17896.2	1193.08	0.000179195	+
Q8R1G2	20282.3	1352.15	0.000178673	+
P48758	20901.2	1229.48	0.000178416	+
Q8K183	12887.8	1073.98	0.000178095	+
P51410	15450.6	1716.74	0.000177905	+
Q6ZQ38	16747.6	274.55	0.000177264	+
Q9JII6	21455.6	1021.69	0.000177032	+
P47739	17749	739.543	0.000176804	+
O88712	14837.6	780.924	0.000176579	+
P62301	19413.6	2157.06	0.00017594	+
Q9D8U8	17452.2	793.282	0.000175815	+
Q9WV32	16253.7	902.983	0.000175606	+
P50580	18650.7	847.759	0.000175447	+
P35293	20826.3	1602.02	0.00017477	+
Q63850	6907.77	690.777	0.000174225	+
Q9CQ54	20750.6	2593.82	0.000173982	+
P50136	18227.7	729.106	0.00017393	+
P35505	15890.3	794.516	0.000173746	+
Q9DCH4	14482.6	965.504	0.000173685	+
Q8BVA4	14911.2	552.265	0.000173437	+
Q9R069	16712.8	539.123	0.000172779	+
P59999	18540.6	1854.06	0.000172687	+
Q9ERG2	11291.8	418.216	0.000172615	+
Q9CY64	19552	1086.22	0.00017246	+
A2APT9	13930.1	435.316	0.000172331	+
Q3UPR9	18514.6	1234.31	0.000172225	+
Q99KC8	16259.2	416.903	0.000172056	+
Q9CQ89	7692.18	1923.05	0.000171809	+
Q8BH97	13337.6	952.688	0.00017146	+
Q9CQ91	15516.1	3879.03	0.000171411	+
O55029	15892.4	353.164	0.000171352	+
P51125	16165.3	425.403	0.000171095	+
P61971	17453.5	2493.36	0.000170963	+
Q9QZD9	18810.4	990.021	0.000170951	+
P56382	18524.1	6174.7	0.000170715	+
Q6P5E4	15108.6	204.17	0.0001706	+
Q8K1Z0	12318.1	1026.51	0.000170554	+
O55135	12152.4	1350.27	0.000169531	+
Q00PI9	14326.9	421.379	0.000169511	+
Q9DBL1	14950.7	747.535	0.000169485	+
P51859	20402.7	1360.18	0.000169219	+
P25444	20560.5	1142.25	0.000168949	+
Q61035	17984.6	620.157	0.00016868	+
P26369	9920.87	661.391	0.000167631	+
Q99JR1	14855.4	990.359	0.000167202	+
P55264	15797	877.609	0.00016687	+
Q99JB2	16516.2	917.569	0.000166805	+
Q8BW75	14419.9	600.831	0.000166624	+
Q91WK2	17650.9	882.543	0.000166485	+
O35593	14188.8	1013.48	0.000165959	+
P62996	11438.4	1039.85	0.000165798	+
P54822	14670	637.825	0.000165732	+
O88544	19655.2	755.97	0.00016571	+
O35643	14467.9	336.464	0.000165616	+
Q9JI91	18509.4	336.534	0.00016549	+
Q99K41	16229.8	324.596	0.000165388	+
Q922Y1	13487.3	1037.48	0.00016496	+
Q9CWJ9	18346.2	539.593	0.000164106	+
Q64105	17361.3	1240.09	0.000163756	+
Q9WTX5	18473.5	1847.35	0.00016336	+
Q9WVH9	11679.7	687.04	0.000163311	+
Q9CPW4	21141.2	2114.12	0.000163087	+
P62849	13389.8	2231.64	0.000163005	+
Q8R1B4	13033.5	325.838	0.00016285	+
Q3UW53	13714	334.487	0.000162608	+
P04186	14536.2	403.782	0.000162552	+
O35344	9438.59	589.912	0.000161406	+
O08547	16502.2	1375.18	0.000161128	+
Q9WUD1	20454.6	974.03	0.000161034	+
P59017	10894	726.265	0.000160695	+
Q91VN4	14774	1136.47	0.000160671	+
Q924M7	9462.78	727.906	0.000160555	+
Q9JKF1	14530	179.383	0.000160346	+
P62075	19421.1	3236.85	0.000160308	+
Q3UZP4	16186.7	4046.67	0.000160286	+
P40336	15948.3	886.017	0.000159929	+
Q3TMH2	12713.6	706.309	0.000159427	+
P62908	23974.1	1261.79	0.000159399	+
Q61559	7524.31	836.034	0.000158741	+
O70250	15099.7	1161.51	0.000158573	+
Q8K310	13430.4	353.432	0.000158397	+
Q61001	11653.4	82.6481	0.00015815	+
P09542	19350.3	1488.48	0.000158056	+
P50285	16139.5	556.535	0.000157915	+
Q9D0T1	18785.9	2348.23	0.000157624	+
P46471	17787	684.114	0.000157615	+
Q5EBG6	13189.6	1884.23	0.000156351	+
Q9CQJ8	11983.6	1497.95	0.000155955	+
Q91YR1	17215.5	819.786	0.000155607	+
Q9DBD0	15338	426.054	0.000154891	+
Q9CQM5	16285.1	2326.44	0.000154411	+
Q8BH86	14245.7	491.232	0.000154394	+
O55023	17133.1	1070.82	0.000154347	+
Q64314	7940.28	794.028	0.000154115	+
O70258	10436.2	652.265	0.000153636	+
P61087	17351.1	1445.92	0.000153436	+
P08074	18691.7	1246.11	0.000153191	+
Q9Z204	16924.4	940.247	0.000153117	+
Q920Q6	9613.29	873.935	0.000152883	+
Q9QYA2	9355.13	850.466	0.000152631	+
P47962	10283.7	934.88	0.000152309	+
Q3UPL0	11546.2	240.545	0.000152163	+
Q922Q8	12871	919.354	0.000151857	+
Q9CXA2	15237.3	846.515	0.000151558	+
Q9D1L9	16589.5	3317.89	0.000151504	+
P97821	12811.6	610.077	0.000151328	+
Q9JKX6	13312.9	1331.29	0.000151218	+
Q9QZE5	14695.9	326.575	0.000150815	+
Q9WUB3	16689.3	327.24	0.000150773	+
Q9D7S9	7765.37	1294.23	0.000150634	+
Q9WVJ2	19314.1	742.85	0.000150606	+
O35215	21848.1	2427.56	0.000150344	+
Q9QZQ8	14376.7	798.703	0.000150304	+
Q8C166	11803.6	536.528	0.000149628	+
Q9CQU0	16550.3	1655.03	0.000149304	+
Q3UPH1	8849.55	680.735	0.000149259	+
P63276	10123.5	2024.7	0.000148859	+
P17427	14804.6	302.136	0.000148837	+
Q91XD2	13687	805.12	0.000148817	+
P26645	11641.9	1058.36	0.000148677	+
Q9CPQ1	18522.9	3704.57	0.000148582	+
P11031	15213	2173.29	0.000148496	+
Q8CIE6	15573	225.695	0.000147966	+
Q9ERR7	15716	1746.22	0.000147266	+
Q64674	15508.8	912.284	0.000146872	+
P31230	15497.9	911.643	0.000146782	+
P56564	7788.37	519.225	0.000146609	+
P29621	13853	659.665	0.000146103	+
Q9D0M5	14896.2	2979.24	0.000146027	+
Q9EQP2	15042.7	501.423	0.000145997	+
P35385	13215.9	1651.99	0.000145793	+
Q9DB15	11326.9	1415.86	0.000145565	+
Q9DCC4	11768.5	1069.86	0.000145523	+
Q9CZW4	12208.9	381.529	0.000145439	+
P12815	12620.1	1402.23	0.000145219	+
Q922B2	18774.7	536.42	0.000145179	+
Q9D8Y0	12571.1	1142.83	0.000145005	+
Q9QVP9	16651.9	264.315	0.000144947	+
Q8BJY1	13639.8	545.594	0.000144626	+
Q9D379	15044.6	578.64	0.000144079	+
Q02013	6339.17	1056.53	0.000144072	+
P55284	11758.8	345.846	0.000143977	+
P29788	10530	554.208	0.000143961	+
P70271	15371.7	853.984	0.000143803	+
O55126	12897	921.216	0.000143679	+
O35129	20044.1	911.097	0.000143672	+
Q9CQE8	17236.8	1077.3	0.000143634	+
O08917	17862.4	637.942	0.00014355	+
Q07797	11279.4	469.974	0.00014354	+
P30412	9304.97	1329.28	0.000143497	+
Q8VCW8	12017.7	445.099	0.000143235	+
Q8R1I1	16230.3	4057.58	0.000143077	+
Q8BGH2	14560.4	582.417	0.000143055	+
P82347	16893.2	938.512	0.000142823	+
Q91YR9	14409.4	847.612	0.000142744	+
Q6ZQI3	14909	931.812	0.000142726	+
A2BDX3	15847	609.501	0.000142523	+
Q8BH43	8901.37	556.336	0.000142472	+
Q91V01	8571.58	535.724	0.000142449	+
Q61129	14744.6	446.807	0.000142323	+
P17156	15089.7	431.135	0.000142198	+
Q64735	9493.26	558.427	0.000142181	+
Q9Z247	11428.1	476.171	0.000142061	+
P82198	12454.9	401.771	0.000141939	+
Q9ERE7	14242.1	1186.85	0.000141682	+
P60904	9470.06	1352.87	0.000141598	+
A3KMP2	14873	572.039	0.000141479	+
Q80UW5	11442	173.364	0.00014134	+
Q99JX3	8220.25	632.327	0.000140864	+
Q6P2L7	13800.6	600.027	0.000140407	+
Q9CXI5	13069.2	1452.13	0.000140112	+
Q811D0	10337.1	295.345	0.000140043	+
Q9JIF7	13254.1	276.127	0.000140011	+
Q9D8B3	14219.4	1184.95	0.000139938	+
Q8C8N2	13855.4	419.86	0.000139737	+
Q8C9S4	11802.8	281.018	0.000139613	+
Q2TPA8	15224.1	543.719	0.000139586	+
O09172	8685.44	965.049	0.000139556	+
Q9R0Q9	6670.74	1111.79	0.000139516	+
Q3ULD5	13913.7	479.782	0.000139466	+
P62774	13731	2288.51	0.000139387	+
P32921	15694	541.173	0.000139315	+
Q91XD7	13498	642.76	0.000139162	+
Q9CQ22	14846.2	1649.58	0.00013866	+
P27659	12659.5	632.974	0.000138224	+
O89053	10870.8	572.149	0.000138163	+
Q6PB66	15635.2	186.134	0.000138058	+
Q8VDM4	14247.8	290.771	0.000137985	+
Q9DB29	11423.1	1038.47	0.000137578	+
Q3TC72	12522.1	834.807	0.00013715	+
P24668	14843.6	927.726	0.000136959	+
P97450	13865.8	2310.97	0.000136769	+
Q99JW4	14707.7	774.087	0.000136516	+
Q9ER88	14829.6	644.763	0.000136492	+
Q8K3H0	12336.7	362.845	0.000136318	+
Q99LP6	16573.8	1183.84	0.000136281	+
O70492	13783.3	1531.48	0.000136048	+
O88696	14447.7	963.178	0.000135934	+
O35343	7420.58	494.706	0.000135708	+
Q99L88	15244.7	491.766	0.00013527	+
P29595	12693.8	3173.46	0.00013485	+
O08756	14516	1036.86	0.00013464	+
Q9D6Y9	11991	352.677	0.000134227	+
P12382	9918.37	330.612	0.000133652	+
Q8R3B1	11823.6	328.435	0.000133571	+
Q5SRX1	10121.5	506.077	0.00013341	+
P43406	13088.5	242.379	0.000132421	+
Q6Y685	13307	332.676	0.00013227	+
Q11011	12382.4	269.183	0.000131722	+
Q61102	11424.1	336.002	0.00013141	+
Q6ZWV7	7617.69	1904.42	0.000131255	+
P39447	10792.4	142.005	0.000130971	+
Q99J45	6912.32	460.822	0.000130652	+
P63321	11709.5	1170.95	0.000130613	+
P33622	12546	2509.21	0.000130508	+
P14148	11385.9	875.841	0.000130326	+
Q6GV12	9179.25	764.937	0.000130255	+
Q3V1T4	11177	328.736	0.000130234	+
O08915	10948	729.868	0.000129985	+
Q9R0N0	10994.8	646.752	0.000129549	+
P62196	14380.9	599.202	0.000129476	+
Q9D8S4	12265.3	1022.11	0.000129431	+
Q9Z2I0	12488.4	328.643	0.000129167	+
P83940	15294.1	2184.87	0.000129061	+
Q400C8	11862.1	659.006	0.000129025	+
Q6ZWN5	13258.4	1205.3	0.000128959	+
P35278	12755.3	1159.58	0.000128574	+
Q3UM45	13803.4	657.303	0.000128541	+
P52760	15181.9	1897.74	0.000128122	+
Q60692	11710.1	1064.56	0.00012795	+
Q99JI4	15391.3	591.972	0.000127662	+
Q8BKC5	11535.3	217.647	0.00012739	+
Q7TMY8	9915.22	55.7035	0.000127323	+
Q62376	8773.56	516.092	0.000127082	+
P63213	13672.9	3418.22	0.000127079	+
Q8CG76	11225.3	660.31	0.000127	+
Q9Z0S1	16148.5	807.424	0.000126938	+
Q8C1E7	10516.3	657.272	0.000126848	+
Q8CHP8	13957.1	775.395	0.00012684	+
Q8BGD9	9336.48	389.02	0.000126833	+
P36993	12480.7	624.033	0.000126474	+
Q3UDE2	12969.7	360.269	0.000126332	+
Q9JLT4	10347	470.319	0.000126078	+
Q9Z1E4	10109.2	315.912	0.000125565	+
Q91WK5	11371.5	1421.43	0.000125461	+
P10852	12212.4	452.312	0.000124965	+
Q8VDM6	9829.35	273.038	0.00012414	+
P70245	2999.29	999.764	0.00012412	+
Q8R3U1	8798.71	1466.45	0.000124119	+
Q8R1F1	10185.9	308.664	0.000123989	+
P97290	10361.1	470.96	0.000123977	+
Q8C1A5	13072.3	335.187	0.000123859	+
Q8K370	12737.6	219.614	0.000123746	+
Q8BJD1	13699.2	244.629	0.000123675	+
Q6PD03	11574.8	462.99	0.000123551	+
Q9ERN0	3574.03	714.806	0.000123441	+
P62309	9201.23	3067.08	0.000123405	+
Q9ESL4	11636.3	283.813	0.000123282	+
Q8C8T8	7472.03	1245.34	0.000123213	+
O70475	12802.2	474.155	0.000123128	+
Q61191	7160	123.448	0.000123031	+
P23927	12935	1293.5	0.000122942	+
P39054	12151.6	264.166	0.000122787	+
Q61490	10312	396.616	0.000122265	+
Q9D1X0	9447.26	1049.7	0.000122134	+
P28352	10165.6	726.113	0.000122045	+
Q99KN9	7143.54	375.976	0.000121992	+
Q61165	5899.91	280.948	0.000121702	+
P97370	9688.46	807.372	0.000121497	+
Q8BHC9	11999.1	461.505	0.000121375	+
Q8K157	8129.81	677.484	0.000121279	+
Q640N1	8558.72	199.04	0.000121002	+
Q64726	11549.8	721.864	0.000120789	+
Q99JT2	13081.8	545.076	0.000120331	+
Q91WJ8	11485.1	370.486	0.00012026	+
Q8BG32	14435.8	534.66	0.000120115	+
Q03311	10000.1	370.375	0.000120086	+
O70252	12759.4	708.853	0.000119976	+
Q3UJU9	11672.7	486.361	0.000119844	+
Q61646	12401	652.685	0.000119785	+
P98078	9515.92	306.965	0.000119664	+
Q8JZQ9	9953.7	276.492	0.000119645	+
Q62446	12038	1003.16	0.000119476	+
Q9WTM5	12827.7	493.374	0.000119429	+
Q9D7B6	13987.8	559.512	0.000119291	+
Q9Z1Z0	9857.84	234.71	0.00011892	+
P63037	10627.4	559.336	0.000118853	+
Q9JK92	11640.1	1164.01	0.000118705	+
O35969	9513.2	951.32	0.000118652	+
P61202	10662.7	484.67	0.000118433	+
P54869	8799.76	439.988	0.000118404	+
O35900	13843.1	2307.18	0.000118384	+
Q61166	12489.2	832.612	0.000118359	+
P63005	12795.7	533.156	0.00011784	+
Q9JM51	10071.4	1438.77	0.000117778	+
Q9WV98	14421.2	2403.54	0.000117742	+
Q9JHR7	10114.5	210.718	0.000117529	+
P62317	14676.5	1834.56	0.000117525	+
Q8VDK1	14563.2	693.487	0.000117265	+
Q6GQT9	12610.5	185.448	0.000117179	+
Q8BX70	10937.6	58.8042	0.000116992	+
Q9DBB9	9796.19	408.175	0.000116911	+
P61358	7807.43	1561.49	0.000116825	+
Q60737	9835.38	546.41	0.000116794	+
Q8R146	9670.29	302.197	0.000116756	+
Q9CPQ3	11101.5	1585.92	0.000116692	+
P26638	10541.6	421.663	0.0001166	+
Q9D8B4	11497.8	1642.55	0.000116544	+
Q8R0H9	7382.41	351.543	0.000116495	+
P62270	12492.3	1388.04	0.000116479	+
Q9CPY7	13132.4	437.746	0.000116388	+
P14142	4035.52	448.391	0.000116274	+
Q61553	12600.3	450.009	0.000116169	+
P53395	12428.6	460.317	0.000116079	+
Q9CQ75	15705.1	2243.59	0.000115984	+
Q1ERP8	10632.9	664.559	0.000115682	+
Q99KK7	11195.7	294.623	0.000115669	+
Q9CX86	11997.9	799.857	0.000115653	+
Q9JJ28	10101.7	168.362	0.000115459	+
Q78PY7	11904	238.081	0.000115109	+
P97822	6547.2	818.4	0.000114815	+
P70460	10380.5	610.616	0.00011471	+
Q9CXI0	10370.2	648.136	0.000114602	+
Q9WVJ3	8840.53	465.291	0.000114175	+
Q8C650	9654.85	459.755	0.00011414	+
Q9D1L0	6142.21	1535.55	0.000113888	+
Q9CR00	10695.3	972.298	0.00011383	+
Q9CZD3	11709	292.725	0.000113509	+
Q91VC3	11243.7	511.077	0.000113372	+
Q9CR09	9755.08	1219.38	0.000112503	+
Q9DBZ5	10372.8	942.979	0.000112032	+
Q6PHU5	7516.65	259.195	0.00011195	+
Q9JM76	11517	1151.7	0.000111947	+
O55013	10473.7	1163.75	0.000111893	+
Q80XL6	12158.8	270.196	0.000111795	+
Q9CWQ0	9061.04	755.087	0.000111636	+
P67871	9449.44	944.944	0.000111619	+
Q99KV1	9867.53	580.443	0.000111484	+
P49935	10123.9	632.746	0.000111384	+
Q9Z1R2	5825.15	194.172	0.000111304	+
P11680	7939.02	467.001	0.000111303	+
P28798	8516.03	370.262	0.000111267	+
Q8BL66	12084.1	145.592	0.000110955	+
P35235	13328.8	341.765	0.000110808	+
Q7TSV4	10886.2	340.194	0.000110762	+
P63168	11271.5	2254.29	0.000110665	+
Q9WV80	9109.08	396.047	0.000110575	+
Q9JMD0	2653.23	442.206	0.000110559	+
P07091	9957.41	1991.48	0.000110548	+
P56376	16584.2	2073.02	0.000110359	+
Q3TGW2	11842.2	370.067	0.000110334	+
Q5XJY5	10573.4	406.669	0.000110221	+
P62627	12700.2	2116.69	0.000110166	+
G3X982	8707.85	158.324	0.000110148	+
Q9QXS6	7798.78	299.953	0.000109792	+
P34928	7163.66	2387.89	0.000109655	+
Q01405	9941.69	268.694	0.000109641	+
Q61285	10807.1	277.105	0.000109558	+
Q61702	9138.69	228.467	0.000109356	+
Q63844	11795.5	536.16	0.000109354	+
Q8CI51	10933.6	364.454	0.000109256	+
Q3UE37	8401.73	600.124	0.000109047	+
Q8K3C3	9608.72	1067.64	0.000108895	+
Q9CPZ8	7318.71	1829.68	0.000108768	+
Q8BYA0	9991.51	172.267	0.000108768	+
Q8BWQ6	10948.5	210.549	0.000108764	+
P49300	9280.36	662.883	0.00010861	+
Q80UU9	10779.4	979.941	0.000108293	+
Q8R1Q8	11303.3	403.691	0.000108239	+
O70378	10765.4	978.671	0.000108216	+
F6ZDS4	9255.59	83.3837	0.000108201	+
Q3UMT1	9975.47	269.607	0.000108132	+
Q91W92	8475.91	529.744	0.000108122	+
Q8R016	11303.4	434.744	0.000108114	+
P54726	8025.2	573.229	0.000107795	+
Q8C570	7220.72	555.44	0.000107759	+
Q8JZR0	9827.59	297.806	0.000107479	+
Q60902	10960	228.334	0.000107391	+
Q99MN1	8668.06	333.387	0.000107111	+
Q8BPB5	9869.55	411.231	0.00010702	+
Q9JHL1	12070.9	603.544	0.000106912	+
Q9DC70	10059.6	914.508	0.0001069	+
Q99LT0	8019.09	2004.77	0.00010646	+
P05201	11659.7	485.82	0.000106407	+
Q9WUL7	12025.2	1093.2	0.000106066	+
Q9CWS0	12106.6	712.151	0.000105837	+
Q62234	11685.7	120.471	0.000105816	+
P62855	8568.84	1713.77	0.000105636	+
P47941	9877.77	658.518	0.000105506	+
Q9DBF1	7566.2	378.31	0.000105459	+
Q9R1J0	9838.88	546.604	0.000105322	+
Q9CWZ7	10876	639.763	0.000105234	+
P62889	10408.4	1734.73	0.000105026	+
Q80UG5	13186.8	338.123	0.000105007	+
Q9WVA3	8997.26	599.817	0.000104976	+
O08810	10535.6	202.607	0.000104935	+
P49722	8517.01	851.701	0.000104577	+
Q9DCM2	13738.2	858.641	0.000104522	+
P62192	11642.1	447.775	0.000104302	+
Q60598	8961.95	358.478	0.000103987		+
Q3V3R4	8217.75	167.709	0.000103897		+
Q9JMA1	9789.38	391.575	0.000103853		+
Q8K2C9	7616.12	507.741	0.000103713		+
Q9D554	8550.3	371.752	0.000103597		+
Q9WUR2	9097.29	505.405	0.000103563		+
P97372	12076.1	805.072	0.000103163		+
Q8C129	9284.65	185.693	0.00010316		+
P83510	8660.21	144.337	0.000102787		+
P70302	8649.2	279.006	0.000102494		+
P46460	11262	261.906	0.000102471		+
P10518	8399.39	599.956	0.000102354		+
Q9R0U0	6904.25	690.425	0.00010235		+
Q8BK64	12450.8	565.946	0.000102165		+
Q8R1V4	10749	826.845	0.000101898		+
P62281	11669.8	1166.98	0.000101861		+
Q9QZ88	10481.6	1048.16	0.00010174		+
Q99LB2	10774.2	718.281	0.000101659		+
Q3TXS7	9124.91	202.776	0.000101535		+
P55937	10496.1	128.001	0.000101371		+
Q8BTI8	8185.15	72.435	0.000101148		+
Q9CXW4	9476.23	1052.91	0.000100989		+
P01635	11863.6	1694.8	0.000100982		+
Q9R1C7	7054.62	195.962	0.000100677		+
P11859	7765.28	408.699	0.000100631		+
Q8R164	12274.6	646.032	0.000100509		+
Q91YW3	8833.67	368.069	0.000100169		+
Q9DBX1	7184.74	1436.95	0.000100155		+
P35459	6310.61	1577.65	0.000100083		+
D3YXK2	7632.68	200.86	9.9983e-05		+
Q64213	4792.6	299.538	9.98722e-05		+
Q9QWK4	11937.3	542.602	9.98639e-05		+
P23116	8459.55	130.147	9.98146e-05		+
P60229	11286.5	403.089	9.96885e-05		+
O35350	10485.1	255.733	9.94415e-05		+
P42567	8942.68	212.921	9.92975e-05		+
P15532	13401.3	1218.3	9.92848e-05		+
Q91XE4	7127.16	593.93	9.92523e-05		+
Q9QWR8	9709.43	441.338	9.87247e-05		+
Q64010	11084.2	615.79	9.86168e-05		+
Q8C838	10002.1	1111.35	9.85215e-05		+
Q9JHW2	10907.2	681.7	9.84745e-05		+
Q9D8S9	11567.4	1445.93	9.84672e-05		+
Q9DC16	7656.54	638.045	9.83937e-05		+
Q60876	3363.19	1681.6	9.81533e-05		+
P51863	8201.69	512.606	9.78363e-05		+
Q60739	9356.02	519.779	9.78272e-05		+
Q61586	7681.72	219.478	9.73992e-05		+
P39061	6772.65	112.877	9.73863e-05		+
Q7TT50	8650.09	105.489	9.72959e-05		+
Q61024	9574.81	319.16	9.71635e-05		+
P62315	6172.01	1543	9.70568e-05		+
Q99L20	8972.84	747.737	9.70385e-05		+
P11609	9028.48	531.087	9.69696e-05		+
Q00724	9693.89	881.262	9.6852e-05		+
Q9DAW9	7844.05	560.289	9.66634e-05		+
O08528	9943.63	198.873	9.65706e-05		+
Q9JK42	8412.74	442.776	9.65441e-05		+
P61255	7084.16	1180.69	9.65034e-05		+
Q9R1Z8	8159.43	247.256	9.64309e-05		+
O09106	8502.61	369.679	9.64227e-05		+
Q9CZS1	8135.86	353.733	9.64155e-05		+
Q8C0D5	8254.31	161.849	9.64084e-05		+
Q9CXW3	8439.22	767.202	9.63234e-05		+
Q9DBG9	7400.82	1480.16	9.61956e-05		+
Q8CHG3	10801.4	103.859	9.56429e-05		+
Q9D1K2	12028.5	1503.56	9.52072e-05		+
P62869	13736.2	1526.25	9.51951e-05		+
Q8VDQ1	6871.96	528.612	9.51693e-05		+
Q91XF0	7325.05	665.914	9.49708e-05		+
P62245	12160.5	1351.16	9.49569e-05		+
P62702	10155.9	677.057	9.49048e-05		+
Q6P9Q4	8315.15	153.984	9.45128e-05		+
P47857	7944.39	233.659	9.43571e-05		+
P13634	9138.02	702.924	9.43139e-05		+
Q9WUK2	10165.8	726.127	9.40247e-05		+
Q99KH8	8692.46	413.927	9.40052e-05		+
Q8VDJ3	9241.8	140.027	9.39992e-05		+
Q9DBG5	10495.5	419.82	9.39695e-05		+
Q9JIX8	8391.27	131.114	9.35912e-05		+
Q99J77	7398.03	493.202	9.34859e-05		+
Q8JZN5	10339.7	287.214	9.34772e-05		+
P49443	9707.01	462.238	9.28901e-05		+
P62071	12519.7	834.644	9.24937e-05		+
Q8C6K9	8719.33	79.2666	9.24704e-05		+
P08032	9557.66	69.7639	9.24679e-05		+
Q8R2Z5	7854.75	436.375	9.23977e-05		+
Q9JM62	7028.11	878.513	9.23799e-05		+
Q9CXY1	4206.88	350.573	9.22737e-05		+
Q8BUV3	9589.41	233.888	9.22498e-05		+
Q9D958	5351.49	1070.3	9.2181e-05		+
Q61391	8827.2	226.339	9.18657e-05		+
Q8BXK8	6569.83	205.307	9.17986e-05		+
Q8CGB6	8272.39	127.268	9.16229e-05		+
Q9R1T4	7792.4	389.62	9.15584e-05		+
Q9DC69	10890.6	453.777	9.13889e-05		+
O35685	10564.3	503.062	9.13877e-05		+
Q60631	10686.1	763.289	9.12335e-05		+
Q05117	6274.4	522.867	9.11434e-05		+
Q9Z0W3	6807.66	121.565	9.10968e-05		+
Q9CXY6	8482.7	446.458	9.10506e-05		+
Q99KR3	8211.03	586.502	9.09797e-05		+
P97855	7411.82	370.591	9.09657e-05		+
Q9DCL9	8172.23	408.611	9.09632e-05		+
Q9Z2Y8	9587.43	639.162	9.09575e-05		+
P61924	4744.22	948.844	9.07637e-05		+
Q9QZ23	8711.87	670.144	9.06659e-05		+
P70297	6386.28	319.314	9.03888e-05		+
Q8QZY1	8285.46	285.705	9.01317e-05		+
Q8BRF7	8419.4	263.106	9.01178e-05		+
Q9Z2A9	7078.69	307.769	8.98943e-05		+
Q9QYS9	7047.57	503.398	8.98085e-05		+
Q9CX56	7575.94	473.496	8.9541e-05		+
Q08093	7408.85	569.911	8.94871e-05		+
Q9WVB0	8654.96	865.496	8.94221e-05		+
Q62418	7746.05	387.303	8.93279e-05		+
P97379	8346.62	347.776	8.90866e-05		+
O55239	5716.25	635.139	8.90285e-05		+
P62900	9095.78	1299.4	8.90033e-05		+
Q76LS9	5128.9	366.35	8.88781e-05		+
Q8R5J9	5223.09	870.515	8.88725e-05		+
P62082	9306.14	846.013	8.8656e-05		+
P22315	9922.32	396.893	8.85881e-05		+
Q60759	7308.38	384.651	8.85437e-05		+
P63030	8980.34	1496.72	8.82795e-05		+
Q8CIZ8	7168.16	60.2366	8.82238e-05		+
Q9CSU0	7061.68	504.405	8.81105e-05		+
Q9Z130	8280.96	552.064	8.77418e-05		+
Q921M3	7232.85	136.469	8.76069e-05		+
Q61704	6293.74	185.11	8.71042e-05		+
P41731	5710.5	713.812	8.71017e-05		+
Q9Z1D1	8756.49	515.088	8.69369e-05		+
Q8K4Z5	7247.86	207.082	8.68383e-05		+
A2AAJ9	7921.22	18.9051	8.65225e-05		+
Q3TW96	9355.53	322.605	8.64958e-05		+
Q62230	6884.58	99.7765	8.64643e-05		+
P38060	9054.71	532.63	8.63658e-05		+
Q80YT7	7696.06	72.6043	8.61805e-05		+
Q91X51	3485.14	387.238	8.59788e-05		+
Q8K354	8797.68	586.512	8.59787e-05		+
P17047	7922.52	396.126	8.56984e-05		+
O70194	6781.98	282.582	8.56354e-05		+
Q8CG03	8429.06	183.24	8.53983e-05		+
Q99K85	8883.03	444.151	8.51321e-05		+
Q61545	4456.73	262.161	8.50017e-05		+
Q9CPX6	5514.93	501.357	8.49936e-05		+
Q99KF1	8589.92	660.763	8.48897e-05		+
Q9R112	10328.9	356.17	8.48148e-05		+
O55026	6592.28	329.614	8.47935e-05		+
Q91VH2	6457.29	269.054	8.47935e-05		+
Q9D1I5	9414.06	941.406	8.47862e-05		+
P14685	10023.3	294.802	8.47731e-05		+
Q9CPT4	5963.87	993.979	8.465e-05		+
Q80XJ3	8671.61	66.7047	8.44929e-05		+
Q60847	7636.31	52.3035	8.4274e-05		+
Q99J09	5765.16	480.43	8.40544e-05		+
Q9Z1P7	6110.04	210.691	8.40046e-05		+
Q62348	8068.05	672.338	8.34285e-05		+
P47911	7884.79	525.653	8.34216e-05		+
Q9Z0R4	6789.73	90.5298	8.33042e-05		+
Q9DBX3	5807.27	193.576	8.30953e-05		+
O55242	4162.9	693.816	8.29671e-05		+
P20060	7733.21	286.415	8.28998e-05		+
Q9JHS3	7753.92	1292.32	8.25041e-05		+
Q9D0R8	6414.51	801.813	8.24051e-05		+
Q9DBL7	4483.35	280.21	8.23087e-05		+
Q9CQW9	4648.62	1162.15	8.2305e-05		+
P59325	7805.56	354.798	8.22819e-05		+
P04247	7114.48	1016.35	8.21631e-05		+
Q9CQ86	8455.53	1409.25	8.20576e-05		+
Q4FZG7	12278.4	1534.8	8.20106e-05		+
Q9EPT5	5677.89	246.865	8.20093e-05		+
O35114	6713.63	319.697	8.18251e-05		+
B2RXS4	7032.66	83.7222	8.17703e-05		+
Q9Z1Q9	7016.59	123.098	8.17433e-05		+
P63325	9100.55	910.055	8.1526e-05		+
Q61699	8022.8	178.284	8.14006e-05		+
O35609	3574.71	446.839	8.13836e-05		+
P56812	12033.1	1203.31	8.13518e-05		+
Q9D023	9619.11	1202.39	8.13484e-05		+
Q91YS8	6182.28	412.152	8.12467e-05		+
Q3U962	7804.9	118.256	8.12189e-05		+
Q8BXZ1	7272.21	330.555	8.11667e-05		+
Q8CH18	5579.92	129.766	8.11601e-05		+
Q9JJI8	6266.35	2088.78	8.11554e-05		+
Q06185	8319.77	2079.94	8.11249e-05		+
P70441	10199	443.437	8.10651e-05		+
Q9CR20	7582.89	1895.72	8.09509e-05		+
Q8BGQ7	7816.32	159.517	8.07651e-05		+
Q8CI32	8026.58	334.441	8.06875e-05		+
Q64339	5711.06	951.844	8.06796e-05		+
E9Q6P5	7587.77	180.661	8.06e-05		+
P97425	5791.94	965.323	8.05528e-05		+
Q9CZ42	8335.44	463.08	8.0525e-05		+
Q8BGT5	7628.52	293.405	8.05143e-05		+
Q9Z2W0	7148.99	324.954	8.03439e-05		+
Q08481	7701.39	208.146	8.01054e-05		+
Q8R326	5460.95	287.418	7.99814e-05		+
Q9CXT8	7401.23	308.384	7.97631e-05		+
P35282	9080.76	698.52	7.97471e-05		+
Q99M28	6385.53	491.194	7.95797e-05		+
Q922D8	7965.87	165.956	7.95384e-05		+
A2ADY9	7527.67	376.383	7.94838e-05		+
Q9CYT6	8251.76	317.376	7.94555e-05		+
Q6NSR8	5694.39	299.705	7.93996e-05		+
Q9DCZ4	7403.39	740.339	7.92534e-05		+
Q8BMK4	8929.58	262.635	7.92235e-05		+
Q52KI8	7034.94	156.332	7.91209e-05		+
Q9D2V7	6286.58	165.436	7.89864e-05		+
P70362	7736.67	483.542	7.89623e-05		+
Q62059	4680.76	45.4442	7.8941e-05		+
Q60770	7605.22	245.33	7.8939e-05		+
Q8BHD7	4996.89	293.935	7.89308e-05		+
Q8BWM0	8847.46	384.672	7.89258e-05		+
Q9D0F3	5758.36	287.918	7.87991e-05		+
Q9CX34	9139.36	435.208	7.86501e-05		+
Q6PDL0	8265.35	306.124	7.86053e-05		+
Q3TZZ7	6870.51	176.167	7.85422e-05		+
Q62470	5386.36	141.746	7.83707e-05		+
Q9CR26	5842.81	486.901	7.82016e-05		+
Q9D832	7865.61	436.979	7.81897e-05		+
P85094	5891.08	736.385	7.81788e-05		+
Q8K327	9232.17	188.412	7.8131e-05		+
Q9WUB4	4781.91	796.984	7.80168e-05		+
P04925	5299.14	588.794	7.80138e-05		+
O09117	4558.53	569.816	7.79866e-05		+
Q61503	6950.18	257.414	7.78564e-05		+
Q99J47	7506.35	469.147	7.77347e-05		+
O88746	6344.65	302.126	7.77314e-05		+
Q62419	7897.06	394.853	7.76391e-05		+
Q99MR6	6688.46	163.133	7.76091e-05		+
Q91YE7	6194.81	176.994	7.73791e-05		+
Q9JIZ9	5134.54	513.454	7.73325e-05		+
Q8BQ47	6967.81	580.651	7.72552e-05		+
P82349	7477.31	467.332	7.7182e-05		+
P60670	6908.19	238.213	7.67339e-05		+
Q9CRD0	7040.14	586.679	7.67141e-05		+
Q9CZX8	10064.4	1006.44	7.66717e-05		+
Q61235	7463.79	287.069	7.66531e-05		+
Q9DCL8	4197.96	699.66	7.66076e-05		+
Q9D0I9	7895.3	213.387	7.64737e-05		+
Q9WVQ5	8964.24	597.616	7.62701e-05		+
O70133	6785.93	107.713	7.62503e-05		+
Q9WV35	6268.03	626.803	7.61716e-05		+
Q9DAR7	8248.44	412.422	7.6153e-05		+
Q6PDG5	5697.25	121.218	7.61259e-05		+
Q9JK37	7149.95	510.71	7.60857e-05		+
Q80YX1	6721.48	69.2936	7.60714e-05		+
P15331	9161.6	295.536	7.59565e-05		+
P21845	5183.85	518.385	7.59273e-05		+
Q9CQ92	6596.5	942.358	7.59087e-05		+
P56375	10779.1	1347.39	7.57923e-05		+
Q6ZWZ2	5293.14	588.127	7.56665e-05		+
Q9CZM2	7932.79	661.066	7.55962e-05		+
O70439	6416.93	534.744	7.55222e-05		+
O70622	4654.79	310.319	7.54626e-05		+
Q9CQW2	7388.41	738.841	7.5366e-05		+
Q8K5B2	5900.99	983.498	7.53068e-05		+
Q7TNP2	7225.85	240.862	7.52111e-05		+
Q9R0E1	6913.98	186.864	7.5154e-05		+
P17710	7763.05	146.473	7.51274e-05		+
Q8BGB7	5538.9	553.89	7.50241e-05		+
Q9CR98	10079.2	1007.92	7.48157e-05		+
Q3ULJ0	8677.6	413.219	7.48054e-05		+
P06330	8545.81	1220.83	7.47832e-05		+
Q14DH7	8046.09	211.739	7.47247e-05		+
A2AR02	3749.18	178.532	7.46824e-05		+
Q8BU85	7619.55	586.119	7.44809e-05		+
Q8CGA0	5704.89	316.939	7.44664e-05		+
Q91VZ6	3296.37	329.637	7.44035e-05		+
Q99KB8	5987.93	460.61	7.43512e-05		+
P62746	6379.48	708.831	7.42665e-05		+
O35864	7073.08	416.064	7.39871e-05		+
Q9JMH6	6751.25	232.802	7.39625e-05		+
Q8R2Y8	7191.13	799.014	7.38891e-05		+
Q8BFQ8	6028.1	669.789	7.38378e-05		+
Q8BIV3	6620.72	124.919	7.37059e-05		+
P28661	7363.97	283.229	7.36888e-05		+
Q9D967	8372.16	837.216	7.36786e-05		+
Q8BP40	6847.25	326.06	7.35416e-05		+
Q5XKE0	7924.98	121.923	7.35358e-05		+
P97823	6914.6	628.6	7.3493e-05		+
P19123	5053.81	842.302	7.34793e-05		+
Q9JKV1	4055.3	368.664	7.34356e-05		+
Q9CZ28	4805.12	533.903	7.30396e-05		+
Q80WQ2	7348.7	174.969	7.29594e-05		+
Q8BIF0	7252.25	604.354	7.28809e-05		+
Q8VCC9	6097.39	169.372	7.28487e-05		+
Q78IK4	8930.32	525.313	7.27959e-05		+
Q3U5Q7	6443.21	306.82	7.27064e-05		+
Q8BFY6	3675.77	525.109	7.2685e-05		+
O09167	5787.52	826.789	7.26806e-05		+
P61222	6609.62	227.918	7.26583e-05		+
P63073	6731.07	611.915	7.2604e-05		+
Q9WTZ1	6031.49	1206.3	7.25923e-05		+
Q9CPS6	6525.2	815.65	7.25717e-05		+
Q9DCT1	7552.6	444.271	7.25061e-05		+
P15327	6633.6	510.277	7.24472e-05		+
A3KGB4	6071.02	119.04	7.21009e-05		+
Q925I1	7978.17	227.948	7.20516e-05		+
Q9DCM0	7667.22	547.658	7.19447e-05		+
Q8BSE0	6775.75	322.655	7.18431e-05		+
P40240	2999.72	599.943	7.17618e-05		+
Q91V61	7700.39	427.799	7.17331e-05		+
Q3UHX2	5127.6	732.514	7.14832e-05		+
Q8R105	3922.78	392.278	7.14376e-05		+
P70274	6352.45	352.914	7.13935e-05		+
Q9ERB0	7134.38	509.598	7.1371e-05		+
P06797	4812.29	401.024	7.13094e-05		+
Q80YF6	5972.28	497.69	7.12447e-05		+
Q9D312	8279.07	306.632	7.1208e-05		+
P84091	7870.66	302.718	7.11868e-05		+
P27601	8527.86	341.114	7.11698e-05		+
Q9Z0P5	7990.43	380.497	7.11274e-05		+
Q9DCV4	8148.52	428.869	7.10887e-05		+
P61027	8639.15	664.55	7.09417e-05		+
Q9R0A0	5449.85	363.323	7.09068e-05		+
Q8R086	6652.4	246.385	7.0894e-05		+
Q8VCF0	4762.12	280.125	7.08423e-05		+
P97351	8507.66	500.451	7.08293e-05		+
Q9CXW2	8347.14	362.919	7.07999e-05		+
P47740	5254.5	276.553	7.06867e-05		+
Q9DB60	7561.63	687.421	7.0548e-05		+
Q02614	5712.09	439.391	7.04038e-05		+
Q61249	6865.6	381.422	7.0397e-05		+
Q8K2C7	6833.7	195.249	7.03767e-05		+
Q8BIQ5	5570.39	242.191	7.03571e-05		+
Q99L04	8731	436.55	7.03039e-05		+
Q8VDL4	4954.16	275.231	7.02605e-05		+
Q8BUK6	6238.77	178.25	7.02518e-05		+
Q9DBE8	6882.69	312.849	7.02355e-05		+
Q9QZ08	6365.84	397.865	7.0223e-05		+
Q69ZN7	7666.64	63.3606	7.00138e-05		+
Q8JZQ2	7761.73	165.143	7.00134e-05		+
Q61133	6395.67	532.972	6.97515e-05		+
Q91YN9	8773.03	626.645	6.96644e-05		+
Q80TM9	5371.82	83.9348	6.95692e-05		+
Q9Z2M7	8485.96	530.372	6.94674e-05		+
Q8BTZ7	5509.79	367.319	6.94373e-05		+
P30275	5921.8	311.674	6.93807e-05		+
Q9JI10	7211.78	257.563	6.93516e-05		+
Q8BH69	4093.76	341.147	6.93205e-05		+
P26040	7167.34	210.804	6.92931e-05		+
Q64442	7637.89	381.894	6.91777e-05		+
P59108	5025.19	239.295	6.91701e-05		+
P97765	3646.39	520.913	6.9153e-05		+
O88543	7630.31	305.212	6.91381e-05		+
Q7TMF3	7684.96	853.885	6.9096e-05		+
Q60973	4574.5	304.967	6.90235e-05		+
P54923	7269.31	363.465	6.89703e-05		+
Q9CZ30	8136.45	325.458	6.89436e-05		+
Q61656	6930.23	210.007	6.89148e-05		+
Q9D906	7130.79	187.652	6.88916e-05		+
Q9Z0H4	4555.71	267.983	6.8877e-05		+
Q5SUR0	5120.89	100.41	6.87758e-05		+
P19253	5569.23	618.804	6.87642e-05		+
Q63810	6765.92	751.769	6.87132e-05		+
P25976	5995.28	162.034	6.86882e-05		+
Q3UEB3	5526.71	240.292	6.85633e-05		+
Q9WV04	6592.2	160.785	6.8455e-05		+
P30999	6742.71	137.606	6.83797e-05		+
Q9EQH2	6365.29	135.432	6.83713e-05		+
Q6NVF9	4148.29	244.017	6.83607e-05		+
P70697	5673.44	354.59	6.83338e-05		+
Q9JLQ0	7158.92	204.541	6.82454e-05		+
Q99K01	6592.05	164.801	6.81645e-05		+
Q922B1	6112.36	407.491	6.81132e-05		+
P50462	6880.79	688.079	6.80873e-05		+
Q6IME9	7853.15	253.327	6.80861e-05		+
P46664	5747.72	287.386	6.80806e-05		+
Q8N7N5	6529.72	217.657	6.80669e-05		+
P48997	6800.15	261.544	6.8027e-05		+
O35074	7294.43	251.532	6.7956e-05		+
Q6P9R4	5387.13	125.282	6.78396e-05		+
O88958	6598.01	439.868	6.78054e-05		+
Q07968	5815.68	187.603	6.76958e-05		+
O35465	6565.85	328.292	6.76771e-05		+
O35566	6065.99	505.5	6.76189e-05		+
P70452	6261.09	417.406	6.75381e-05		+
Q9EST1	6899.99	287.5	6.75248e-05		+
P59235	4070.32	339.193	6.7452e-05		+
Q9ET30	4000.46	210.55	6.735e-05		+
Q9D8B7	6929.55	407.62	6.72524e-05		+
O35345	5205.98	236.635	6.72011e-05		+
Q9JIA7	3887.49	215.972	6.71161e-05		+
Q5SVD0	4237.4	605.342	6.70257e-05		+
Q8R059	6283.95	369.644	6.69158e-05		+
Q9JJW6	6541.99	594.726	6.68398e-05		+
Q9CQZ5	7385.83	923.229	6.6821e-05		+
P14901	5141.08	428.423	6.68113e-05		+
Q9D1C8	7202.87	554.067	6.67858e-05		+
Q9D7J9	6090.55	435.039	6.67587e-05		+
Q99KP3	6395.28	399.705	6.66481e-05		+
Q9D1J1	5895.69	491.307	6.65427e-05		+
Q8VED5	6834.43	244.087	6.65301e-05		+
Q61508	6703.5	223.45	6.6491e-05		+
Q9DC61	7224.82	240.827	6.64688e-05		+
Q61687	5939.68	50.3362	6.64127e-05		+
Q6GU68	4609.27	307.285	6.63822e-05		+
Q08943	5198.75	173.292	6.63626e-05		+
Q8K2K6	4102.68	241.334	6.63404e-05		+
P83917	6526.41	652.641	6.62002e-05		+
Q9D6U8	7867.52	786.752	6.60417e-05		+
P29416	5060.75	230.034	6.60328e-05		+
O70362	6425.34	149.426	6.59941e-05		+
Q9QXY6	6408.95	228.891	6.59307e-05		+
Q9Z2A7	4164.39	244.964	6.5883e-05		+
Q91VF2	6609.33	413.083	6.58581e-05		+
P81117	5802.13	276.292	6.58239e-05		+
P50171	6267.07	522.256	6.57628e-05		+
Q9D024	4969.51	248.476	6.57145e-05		+
Q9D6S7	5251.06	477.369	6.56776e-05		+
Q9CR86	6040.97	862.995	6.56477e-05		+
Q60715	5685.76	227.43	6.5606e-05		+
Q921J2	6083.92	675.991	6.54741e-05		+
P97364	3177.56	288.869	6.54401e-05		+
P46061	6085.84	217.352	6.53968e-05		+
P53811	8314.74	437.618	6.52571e-05		+
Q8VE62	4521.6	301.44	6.52438e-05		+
Q9WUP7	6589.67	366.093	6.52195e-05		+
P62717	5978.24	664.249	6.52193e-05		+
Q9CZG3	7258.8	659.891	6.51661e-05		+
P28741	6002.32	171.495	6.51134e-05		+
P61082	6575.43	657.543	6.50836e-05		+
Q9D8C4	6459.94	430.662	6.50134e-05		+
P50608	4142.93	318.687	6.49815e-05		+
Q9CQU3	5370.59	596.733	6.49642e-05		+
Q9D8W5	6460.96	258.439	6.47404e-05		+
Q64737	5959.9	126.806	6.45607e-05		+
P35821	6580.48	274.187	6.43975e-05		+
Q9CQ10	4850.43	538.936	6.43673e-05		+
Q8VDQ8	6593.54	313.978	6.43203e-05		+
P60605	3656.81	731.362	6.43058e-05		+
Q8K4G1	5618.41	75.9244	6.42325e-05		+
Q8K411	6469.36	115.524	6.42155e-05		+
O08579	5065.6	460.509	6.41979e-05		+
Q9EPJ9	5385.84	299.213	6.41769e-05		+
P42225	5905.17	155.399	6.41735e-05		+
P05622	4741.49	110.267	6.41309e-05		+
Q4VC33	6850.21	297.835	6.3947e-05		+
O89103	4282.68	194.667	6.39385e-05		+
Q9WUZ9	5445.27	286.593	6.39299e-05		+
Q921T2	6061.24	202.041	6.39011e-05		+
Q9Z2H5	6169.77	137.106	6.38389e-05		+
Q9EP69	7038.27	201.093	6.37542e-05		+
Q9QXZ0	6667.43	16.1439	6.36029e-05		+
P06684	5545.84	71.1005	6.36002e-05		+
Q99KG3	5185.8	129.645	6.35452e-05		+
Q3V0K9	6476.39	190.482	6.35155e-05		+
Q99P30	6491.11	499.316	6.35086e-05		+
Q91VC7	4020.46	804.091	6.34014e-05		+
Q3UGR5	5591.19	465.932	6.33966e-05		+
Q3TEA8	5710.95	219.652	6.33177e-05		+
Q8VH51	5396.32	224.847	6.32601e-05		+
Q05BC3	5956.83	148.921	6.32493e-05		+
Q9CR16	6883.1	327.767	6.32436e-05		+
O55042	5530.53	921.755	6.32336e-05		+
Q07456	6498.22	342.012	6.32163e-05		+
P62257	4519.31	645.616	6.31547e-05		+
Q99K23	5577.53	253.524	6.3053e-05		+
Q9QXW2	4723.44	205.367	6.28749e-05		+
Q8BM72	5639.11	256.323	6.27718e-05		+
P27612	6837.9	151.953	6.27673e-05		+
Q9R099	6681.93	267.277	6.27629e-05		+
Q8VI36	5745.4	205.193	6.26558e-05		+
P19973	6480.46	360.026	6.26011e-05		+
Q9Z2B9	6012.84	154.175	6.25402e-05		+
P43276	5258.76	584.307	6.24749e-05		+
Q8C2Q3	4363.2	189.704	6.23955e-05		+
P70336	6481.05	82.0386	6.23923e-05		+
Q9Z2Z6	7176.42	398.69	6.23581e-05		+
Q9JIY5	5599.92	266.663	6.23228e-05		+
Q9Z1T1	6214.55	107.147	6.22841e-05		+
Q80X50	3263.21	112.525	6.22448e-05		+
Q9Z2D6	5765.11	250.657	6.20949e-05		+
Q9D892	5984.11	598.411	6.20562e-05		+
P11531	5720.49	30.7553	6.20249e-05		+
Q8BMP6	3915.6	217.533	6.20006e-05		+
O08992	3232.08	404.011	6.1953e-05		+
P70402	4708.66	247.824	6.17846e-05		+
Q9Z0J0	5553.7	793.386	6.17789e-05		+
Q78IS1	5609.52	509.956	6.15003e-05		+
Q6NZB0	6090.71	435.051	6.14261e-05		+
Q9WVA2	7046.03	1174.34	6.14125e-05		+
Q8K1R7	4957.59	120.917	6.13557e-05		+
Q71FD7	5052.04	315.752	6.13476e-05		+
Q8R349	4892.83	181.216	6.13282e-05		+
P53026	5714.35	519.487	6.13003e-05		+
P27573	4213.81	468.201	6.12477e-05		+
Q60634	7421.84	274.883	6.12355e-05		+
Q99NB1	5197.54	173.251	6.12284e-05		+
Q9QX60	4805.08	400.423	6.12165e-05		+
Q8BGI4	5037.25	162.492	6.11217e-05		+
Q9D0R2	6494.65	154.634	6.10443e-05		+
Q00915	8126.22	812.622	6.09829e-05		+
Q9ERK4	6053.28	116.409	6.08939e-05		+
Q8BUE4	6010.68	316.352	6.08797e-05		+
Q8BVD5	5881.98	196.066	6.0858e-05		+
Q05CL8	6537.55	198.108	6.07998e-05		+
P49442	5032.21	296.013	6.07668e-05		+
Q501J6	5669.93	177.185	6.07532e-05		+
Q9DCR2	5310.95	590.106	6.07339e-05		+
Q9D1P4	5832.98	343.116	6.06931e-05		+
Q8BH04	5990.88	181.542	6.06369e-05		+
Q9DBY8	6359.86	135.316	6.0545e-05		+
P70663	5476.96	176.676	6.04855e-05		+
O70493	6010.32	667.813	6.04578e-05		+
Q99J99	5403.85	385.99	6.03672e-05		+
Q8CBW3	4624.6	243.4	6.02739e-05		+
Q9CWZ3	5106.43	638.304	6.01245e-05		+
Q60823	6832.14	227.738	6.01196e-05		+
Q99L45	6993.8	333.038	6.00807e-05		+
Q8CC86	5440.79	217.632	6.00531e-05		+
Q9JHQ5	5465.52	364.368	6.0007e-05		+
Q6PFD9	4490.06	64.1437	5.99183e-05		+
Q9R059	5563.79	397.413	5.98381e-05		+
O70591	7632.18	763.218	5.97628e-05		+
Q8C8U0	5579.56	116.241	5.97526e-05		+
P03921	2394.37	184.182	5.97262e-05		+
Q8C0M9	5934.42	370.901	5.9635e-05		+
Q8CG72	3833.66	319.471	5.96334e-05		+
Q99LR1	5275.51	277.658	5.95283e-05		+
Q9JII5	2908.44	290.844	5.95239e-05		+
O35682	2849.3	356.163	5.95149e-05		+
Q9DB25	4439.34	341.488	5.94996e-05		+
Q99J39	6195.93	229.479	5.94867e-05		+
Q8VD75	6649.85	109.014	5.94771e-05		+
Q9QX47	3632.76	47.1788	5.93557e-05		+
Q3TYX2	2410.09	482.017	5.91935e-05		+
Q8BXK9	5743.83	441.833	5.91907e-05		+
P63280	4850.13	692.876	5.90868e-05		+
Q8BVA5	6313.68	332.299	5.88156e-05		+
Q6PIU9	4281.46	329.343	5.88104e-05		+
O88653	5485.65	914.275	5.86828e-05		+
Q91WQ3	7739.29	209.17	5.85506e-05		+
Q9WTL7	5982.38	498.532	5.85373e-05		+
Q9DBM2	6153.86	157.791	5.85137e-05		+
Q8VEA4	3182.37	795.592	5.84948e-05		+
Q9WV95	8088.66	898.74	5.8393e-05		+
Q8WUR0	3268.18	817.045	5.83758e-05		+
Q9EQS3	6163.22	1027.2	5.82303e-05		+
Q8K274	4993.46	356.676	5.8223e-05		+
O70165	5406.38	337.899	5.80867e-05		+
Q02357	5344.85	60.0545	5.80857e-05		+
P11835	6759.1	143.811	5.79075e-05		+
Q9CZW5	5784.21	180.756	5.786e-05		+
Q922J3	6270.62	78.3827	5.78413e-05		+
Q9R233	4660.3	245.279	5.7775e-05		+
P48774	6868.92	457.928	5.77616e-05		+
Q99JX4	5151.46	286.192	5.76265e-05		+
Q91V16	4676.32	1169.08	5.75323e-05		+
P05555	4281.53	95.1452	5.74429e-05		+
Q9R0Q6	6115.74	291.226	5.74114e-05		+
Q9QUR7	5925.91	658.434	5.72851e-05		+
Q63829	5486.03	548.603	5.7255e-05		+
P46656	5990.8	599.08	5.70919e-05		+
Q6NZC7	3698.23	108.772	5.70668e-05		+
Q3UVK0	3845.82	120.182	5.70012e-05		+
Q8C0E2	5527.42	307.079	5.68994e-05		+
O55106	5021.61	139.489	5.67906e-05		+
Q9Z2G9	5788.52	445.271	5.66626e-05		+
Q7TNG8	4611.24	230.562	5.66139e-05		+
Q8VE95	7844.12	490.258	5.64892e-05		+
Q8K4L3	5426.05	48.8833	5.62945e-05		+
P97468	2547.27	283.03	5.60476e-05		+
O08599	5414.43	174.659	5.58907e-05		+
Q99JT6	4099.57	409.957	5.58896e-05		+
P15379	2886.01	137.429	5.57251e-05		+
Q8R010	4655.56	332.54	5.57154e-05		+
Q9CQJ6	4767.79	529.754	5.5612e-05		+
Q8CIG8	5488.51	161.427	5.55638e-05		+
Q9D8V0	3933.69	280.978	5.55523e-05		+
P30416	6572.31	226.631	5.53532e-05		+
Q7TSC1	4944.07	50.9698	5.53282e-05		+
Q921M7	6022.41	316.969	5.52057e-05		+
O88447	6631.49	189.471	5.51409e-05		+
Q99LI8	3378.78	135.151	5.50551e-05		+
P32848	7789.7	973.712	5.50171e-05		+
P54116	5547.42	369.828	5.4953e-05		+
P56546	4263.08	236.838	5.49124e-05		+
Q91ZW8	5594.11	430.317	5.48717e-05		+
Q61655	6013.83	214.78	5.48594e-05		+
Q8VBW6	4586.59	191.108	5.4552e-05		+
Q64324	5553.67	173.552	5.45411e-05		+
P55096	5338.85	152.539	5.45232e-05		+
Q9D4J1	5094.86	424.572	5.42896e-05		+
Q91W89	4357.38	99.0313	5.42578e-05		+
Q99N84	3988.61	398.861	5.42184e-05		+
P68404	5067.94	149.057	5.41792e-05		+
Q99LB6	4280.47	305.748	5.41444e-05		+
Q8BWF0	5718.18	204.221	5.41309e-05		+
P23780	3436.63	156.211	5.40945e-05		+
O55057	2633.19	658.297	5.40842e-05		+
Q9CQW1	7158.74	511.339	5.40379e-05		+
Q02105	5266.97	438.914	5.40271e-05		+
Q9WUA2	5380.13	173.553	5.39983e-05		+
Q9R1Q9	3125.51	223.251	5.39299e-05		+
Q8BP48	5526.87	263.184	5.38709e-05		+
Q8BVI5	4900.45	306.278	5.37858e-05		+
Q99LD4	3816.72	212.04	5.36666e-05		+
Q9D753	4537.42	378.119	5.36311e-05		+
P61021	5244.42	476.765	5.35283e-05		+
Q9WUZ5	3638.24	519.749	5.341e-05		+
Q62148	4168.64	198.507	5.32344e-05		+
O08663	5307.13	212.285	5.32056e-05		+
Q8BGS2	6587.09	1097.85	5.31094e-05		+
D3Z7P3	5147.42	151.395	5.30308e-05		+
Q8VCM8	3914.44	177.929	5.301e-05		+
Q64669	5420.15	361.344	5.29808e-05		+
Q8CHP5	3445.09	492.155	5.28869e-05		+
Q9Z0M6	4322.39	123.497	5.28787e-05		+
Q61187	4047.03	252.939	5.28555e-05		+
P26262	5932.02	156.106	5.27723e-05		+
Q9JJE7	3019.05	215.647	5.25644e-05		+
Q8C6I2	5140.49	571.166	5.25615e-05		+
Q3THK7	5058.75	144.536	5.25179e-05		+
O54794	2032.3	338.717	5.24014e-05		+
Q8VHL1	4092.09	272.806	5.23341e-05		+
O09174	5031.38	264.81	5.23015e-05		+
Q571I9	2866.36	130.289	5.22978e-05		+
Q5SSZ5	3689.03	70.9428	5.22749e-05		+
P58021	2490.26	146.486	5.22583e-05		+
P21460	5680.01	710.002	5.2222e-05		+
Q9ERU9	5202.22	32.3119	5.22008e-05		+
Q8VCS0	4009.02	190.906	5.21737e-05		+
Q9CQ45	5813.66	581.366	5.20503e-05		+
Q8K482	4291.06	93.2839	5.18261e-05		+
Q9D517	4038.79	252.424	5.17574e-05		+
Q8VEH3	5107.34	510.734	5.17369e-05		+
Q3UJB9	3931.67	71.4849	5.16235e-05		+
P97434	5407.91	93.2398	5.1404e-05		+
B2RY56	3375.87	108.899	5.13437e-05		+
P70180	5410.86	180.362	5.10868e-05		+
P04919	3335.77	104.243	5.09162e-05		+
D3YZP9	4262.17	202.96	5.08854e-05		+
Q9CQI6	6063.12	673.68	5.08694e-05		+
Q91W50	5798.25	120.797	5.07959e-05		+
Q9CX80	6490.69	499.284	5.07568e-05		+
Q8CJ53	4373.89	156.21	5.06693e-05		+
Q9D281	4200.58	175.024	5.05741e-05		+
Q3TWW8	4373.74	273.359	5.05243e-05		+
Q91VT4	4196.66	419.666	5.05116e-05		+
Q80YC5	3080.78	162.146	5.04516e-05		+
Q99NH0	3029.17	38.8356	5.04344e-05		+
Q9JHU9	3318.35	174.65	5.03983e-05		+
Q91V12	4750.52	250.027	5.0368e-05		+
Q9D1J3	4063.24	451.471	5.03171e-05		+
Q9QXA5	5629.01	703.626	5.02387e-05		+
P62320	4571.79	761.966	5.02177e-05		+
P49710	3713.84	195.465	5.02117e-05		+
P62743	3735.7	622.616	5.01787e-05		+
O08800	3765.72	251.048	5.01135e-05		+
Q8VHC3	4511.32	644.475	4.9991e-05		+
Q6P5F9	4543.06	85.7181	4.99692e-05		+
O35309	5383.3	299.072	4.99073e-05		+
Q9CQZ1	6116.13	1223.23	4.98824e-05		+
Q920E5	4409.93	259.408	4.98555e-05		+
Q810B6	4254.12	81.8099	4.98458e-05		+
P70195	3872.28	352.025	4.98334e-05		+
Q6QD59	5616.96	401.211	4.97359e-05		+
P21956	4301.35	204.826	4.9705e-05		+
Q64337	3253.89	216.926	4.94795e-05		+
Q9CZR2	4661.59	125.989	4.94056e-05		+
Q91ZP3	4909.01	102.271	4.94045e-05		+
Q9CRC9	5346	334.125	4.91857e-05		+
Q9CZR8	4406.92	293.794	4.91639e-05		+
Q9DCG2	2448.6	408.099	4.91345e-05		+
Q91YP2	4511.91	128.912	4.91027e-05		+
P70699	3798.48	97.3969	4.90081e-05		+
Q9CW42	4359.09	272.443	4.90026e-05		+
Q9DB73	3939.62	303.048	4.89904e-05		+
Q9JM96	4910.48	272.804	4.89268e-05		+
Q9JHS4	5968.73	149.218	4.89234e-05		+
Q8JZY2	4522.8	452.28	4.88634e-05		+
Q4VAA2	5195.79	346.386	4.87709e-05		+
Q9CRD2	4123.58	294.541	4.87309e-05		+
Q61409	4042.73	84.2235	4.8724e-05		+
Q3UMR5	4403.67	259.04	4.86811e-05		+
Q80Y98	4003.61	129.149	4.86722e-05		+
Q9D6K5	5193.08	649.135	4.86197e-05		+
Q3UIA2	3674.21	111.34	4.86182e-05		+
P11930	4070.52	254.407	4.85795e-05		+
P17095	5298	883	4.85696e-05		+
Q9CWE0	4186.84	322.064	4.83912e-05		+
Q8R2M2	4119.03	121.148	4.83551e-05		+
Q61210	4464.75	99.2166	4.83065e-05		+
Q8VD04	5055.56	109.903	4.82586e-05		+
Q9D2R0	4332.4	135.387	4.82168e-05		+
Q8K0D5	4993.56	121.794	4.81918e-05		+
Q8JZU2	4778.65	298.665	4.79944e-05		+
Q8R4Y4	3660.99	36.6099	4.78964e-05		+
Q91VA6	5555.12	241.527	4.78938e-05		+
Q6A4J8	4956.92	78.6813	4.78732e-05		+
Q3TDN2	4236.93	192.588	4.78583e-05		+
Q8R0G9	4867.39	78.5063	4.78209e-05		+
P51855	4831.46	193.259	4.78194e-05		+
Q8BP67	5111.04	567.894	4.78169e-05		+
P55065	4259.48	185.195	4.77589e-05		+
Q9EPL8	3374.64	84.366	4.77405e-05		+
P51655	3704.12	161.049	4.77347e-05		+
Q80SU7	4448.24	35.8729	4.7708e-05		+
Q99KW3	4353.69	44.8834	4.74811e-05		+
P36536	4467.75	446.775	4.73339e-05		+
Q9CWM4	5605.31	700.663	4.73008e-05		+
O54998	6008.92	400.595	4.72647e-05		+
P31996	2858.37	285.837	4.71329e-05		+
Q91VC4	4780.13	199.172	4.71005e-05		+
Q9CQB5	5863.22	651.469	4.70261e-05		+
Q8BFR4	4219.59	162.292	4.70187e-05		+
Q9EP72	3395.62	377.291	4.70112e-05		+
Q9CQR6	4514.73	282.17	4.69838e-05		+
Q924Z4	3302.59	220.173	4.69471e-05		+
Q9WV60	4452.33	212.016	4.69015e-05		+
Q9QXE0	4194.22	155.341	4.6833e-05		+
P31938	3637.61	227.35	4.68088e-05		+
Q91YI0	4961.1	190.812	4.67552e-05		+
P26516	4049.7	269.98	4.67205e-05		+
Q9JLI8	4499.21	89.9841	4.6715e-05		+
Q8BH58	4733.54	315.569	4.67085e-05		+
Q9JLZ3	5313.68	295.205	4.66886e-05		+
Q9EPB4	5510.89	459.241	4.66709e-05		+
Q61584	4258.76	129.053	4.65867e-05		+
Q07113	4015.56	35.8532	4.64928e-05		+
Q9R0C0	2491.52	498.304	4.64499e-05		+
Q9DCS2	5615.96	431.997	4.64151e-05		+
Q8BH79	3463.99	128.296	4.6291e-05		+
Q8R001	4231.88	264.493	4.62798e-05		+
Q9Z2Q6	4333.8	228.094	4.61776e-05		+
O89112	3650.37	214.727	4.6108e-05		+
Q9D6Y7	5611.85	374.123	4.60464e-05		+
P54823	4483.42	179.337	4.60262e-05		+
P69566	2869.44	136.64	4.59527e-05		+
O54901	2793.14	310.349	4.59393e-05		+
P10711	4866.36	286.256	4.59312e-05		+
P14131	6487.03	589.73	4.59307e-05		+
Q8VEH8	4586.74	176.413	4.58728e-05		+
Q99NB8	2585.14	152.067	4.5735e-05		+
Q05D44	3575.12	70.1004	4.5688e-05		+
A2AUC9	4099.33	141.356	4.56498e-05		+
Q9CZ04	4460.79	318.628	4.56095e-05		+
Q9D3P8	5018.88	557.654	4.55859e-05		+
O08759	3853.07	96.3268	4.55369e-05		+
Q9Z1J3	4942.39	190.092	4.5526e-05		+
Q8BFP9	4701.84	195.91	4.5458e-05		+
Q91XD6	5263.72	219.322	4.54274e-05		+
Q9QXV0	4220.23	351.686	4.54213e-05		+
P15508	5003.84	39.0925	4.54059e-05		+
Q9CZJ2	5036.83	125.921	4.53938e-05		+
O35841	4218.49	168.74	4.53795e-05		+
Q62277	3376.79	281.399	4.53431e-05		+
Q6P9Q6	3379.51	71.9045	4.52782e-05		+
A6H6E2	4085.09	90.7798	4.52312e-05		+
Q9WU28	4401.69	550.211	4.52254e-05		+
O70152	5224.78	326.549	4.51192e-05		+
Q3U829	4148.97	106.384	4.50452e-05		+
Q91VR8	6502.31	1083.72	4.49649e-05		+
O35166	2685.95	383.707	4.49311e-05		+
Q9Z2K1	5697.88	183.803	4.49225e-05		+
Q9JME7	5324.34	591.593	4.48782e-05		+
Q8C0C7	3948.04	164.502	4.48736e-05		+
Q91YX5	4396.53	219.827	4.48575e-05		+
Q8BZW8	3494.1	120.486	4.47534e-05		+
Q8VE97	2529.62	168.641	4.47113e-05		+
P60824	5067.55	506.755	4.46571e-05		+
Q61239	3422.06	213.878	4.4582e-05		+
P26618	3909.91	76.665	4.45437e-05		+
Q9CQL1	5502.14	550.214	4.45367e-05		+
Q9CR51	3418.98	683.797	4.4446e-05		+
Q9JJH1	3858.58	551.226	4.44426e-05		+
Q91WK0	3779.76	198.935	4.44207e-05		+
Q8BPG6	4050.01	270	4.44183e-05		+
Q1XH17	4606.72	177.182	4.43191e-05		+
P62073	6337.66	905.38	4.43036e-05		+
P17439	3563.21	161.964	4.41986e-05		+
Q3UNZ8	4189.13	246.42	4.41234e-05		+
P53702	4209.85	300.704	4.41152e-05		+
P70392	3704.93	68.6098	4.40824e-05		+
Q8K2I3	3949.69	151.911	4.3867e-05		+
Q8CFH6	2927.91	88.7246	4.37832e-05		+
[truncated: 3,162 more rows]
