# Supplementary material for: Comprehensive map and functional annotation of the mouse white adipose tissue proteome
Source: PeerJ journal article supplement (doi:10.7717/peerj.7352), 2019-07-25

**Supplemental Fig.S1 Workflow used to profile mouse gonadal WAT proteome.**

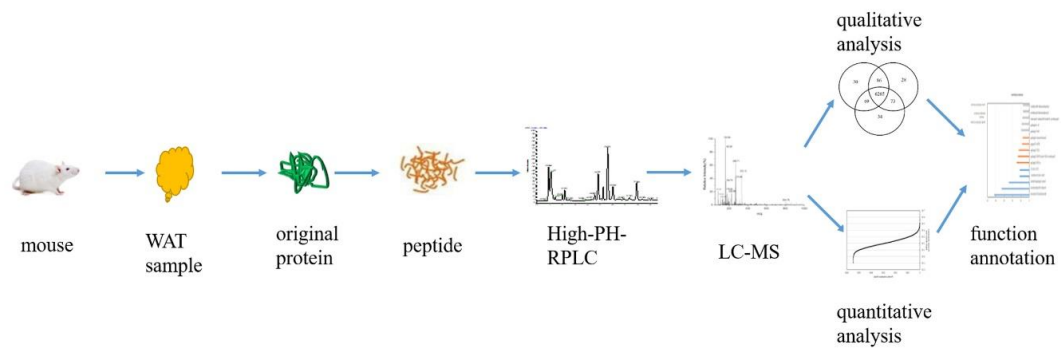

**Supplemental Fig.S2 Protein size distribution.**

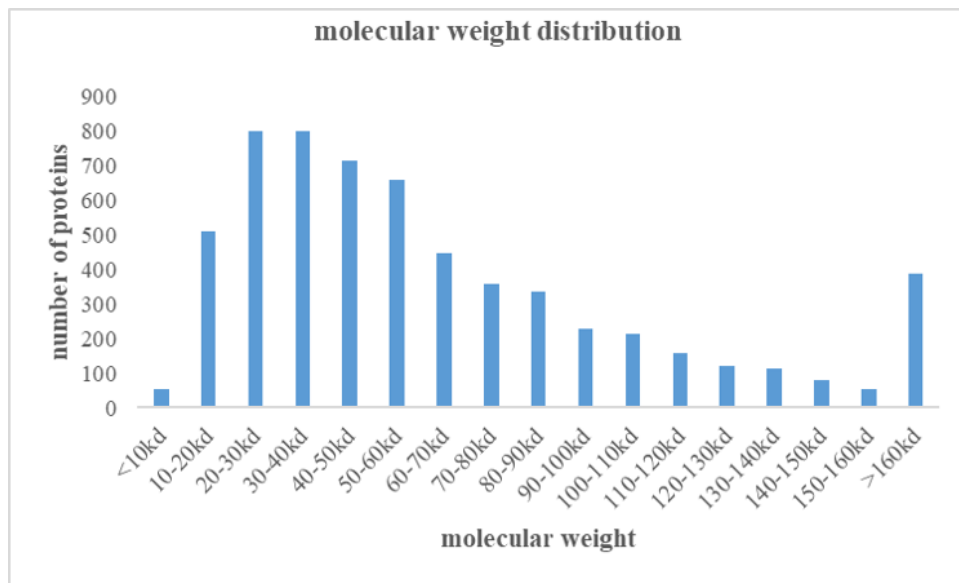

**Supplemental Fig.S3 Correlation plot of protein abundance between every two runs** (A. Correlation plot of protein abundance between run1 and run2, B. Correlation plot of protein abundance between run1 and run3, C. Correlation plot of protein abundance between run2 and run3).

A

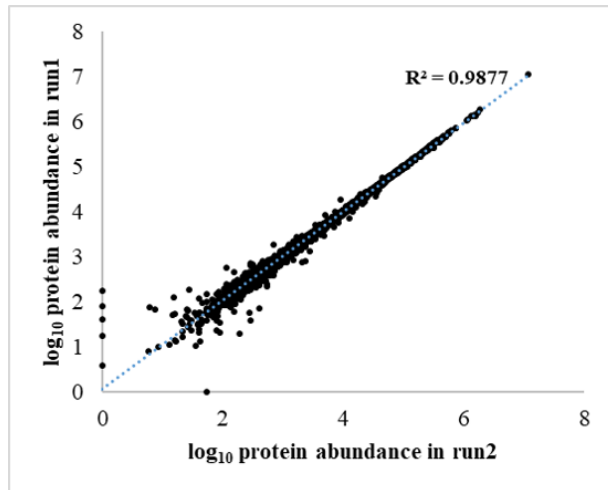

B

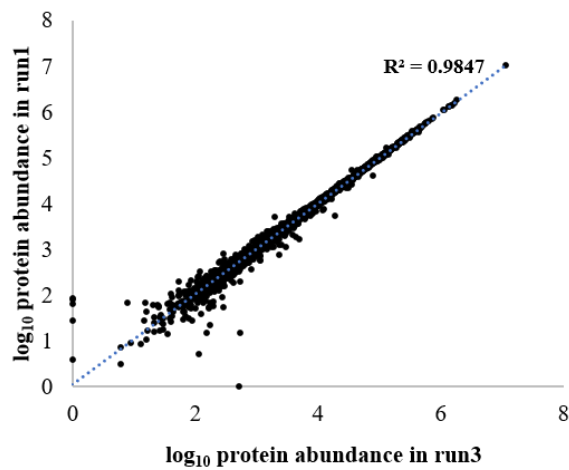

C

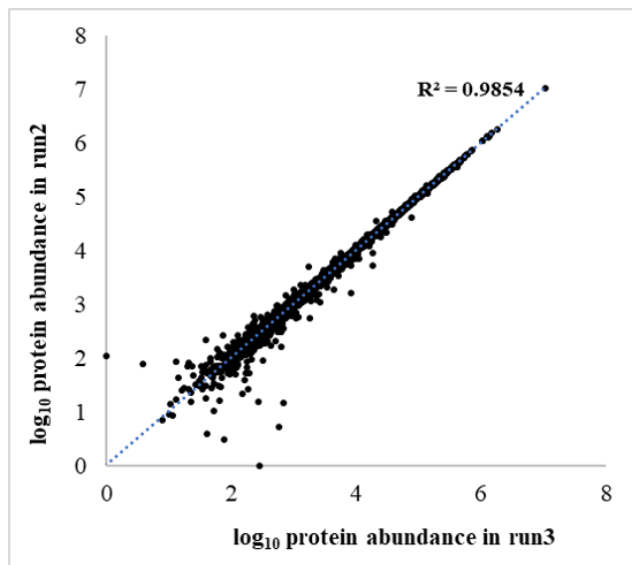

Supplemental Fig.S4 Venn diagram comparing large-scale studies on the mouse WAT proteome with our high-abundance proteins.

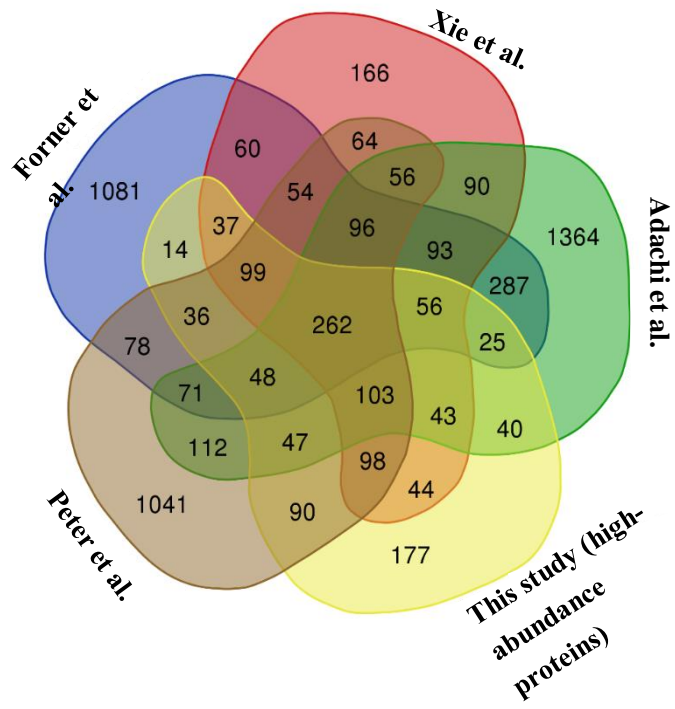

**Supplemental Fig.S5 Top canonical pathways in WAT** (The horizontal coordinates represent the number of proteins, and the vertical coordinates represent canonical pathways in WAT).

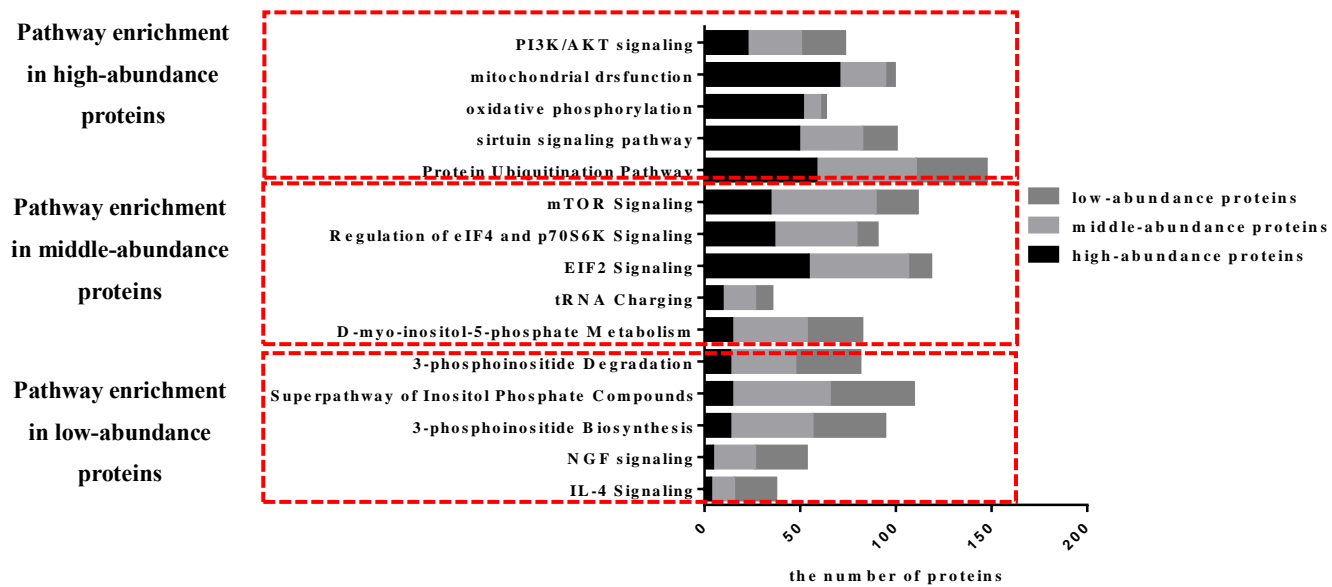

**Supplemental Fig.S6 Mitochondrial dysfunction and oxidative phosphorylation signaling pathway (A. mitochondrial dysfunction; B. oxidative phosphorylation. The red-filled graph represents high-abundance proteins; the gray one is middle-abundance proteins; and the green one is a low-abundance proteins).**

**A**

Mitochondrial dysfunction - pathway to IPAC... Expr Fold Change

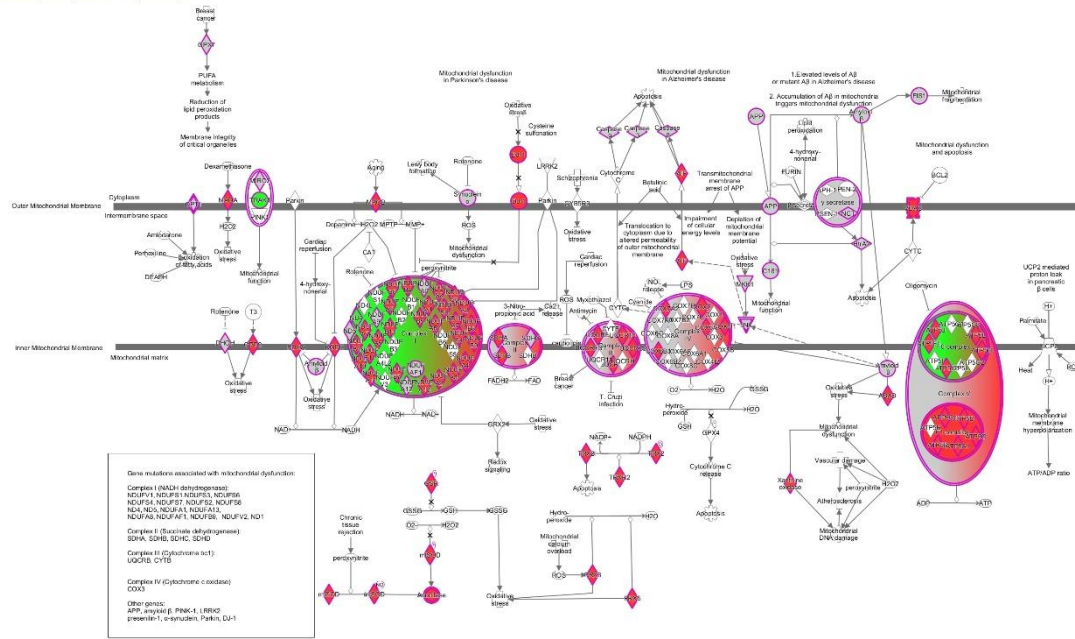

**B**

Oxidative Phosphorylation - pathway to IPAC... Expr Fold Change

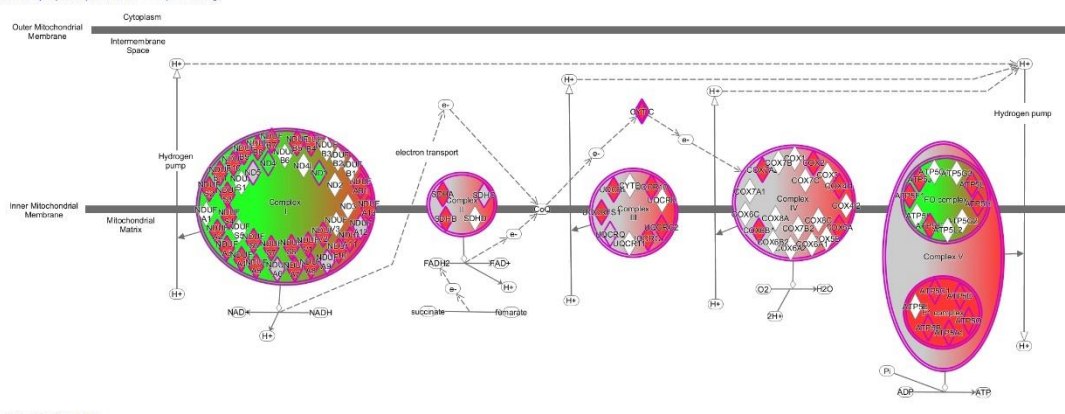

Supplement: supplemental_fig.pdf [file supplemental_fig.pdf]
